## Elevated seminal plasma estradiol and epigenetic inactivation of *ESR1* and *ESR2* is associated with CP/CPPS

Nils Nesheim<sup>1,2</sup>, Stuart Ellem<sup>3,4</sup>, Temuujin Dansranjavin<sup>1</sup>, Christina Hagenkötter<sup>1,2</sup>, Elena Berg<sup>1,2</sup>, Rupert Schambeck<sup>1,2</sup>, Hans-Christian Schuppe<sup>1</sup>, Adrian Pilatz<sup>1</sup>, Gail Risbridger<sup>3</sup>, Wolfgang Weidner<sup>1</sup>, Florian Wagenlehner<sup>1,\*</sup> and Undraga Schagdarsurengin<sup>1,2,\*</sup>

<sup>1</sup>Clinic of Urology, Pediatric Urology and Andrology, Justus Liebig University, Giessen, Germany

<sup>2</sup>Working Group Epigenetics of the Urogenital System, Clinic of Urology, Pediatric Urology and Andrology, Justus Liebig University, Giessen, Germany

<sup>3</sup>Department of Anatomy and Developmental Biology, Monash University, Clayton, Victoria, Australia

<sup>4</sup>Department of Physiology, Biomedicine Discovery Institute, Monash University, Clayton, Victoria, Australia

\*These authors contributed equally

**Correspondence to:** Undraga Schagdarsurengin, **email:** Undraga.Schagdarsurengin@chiru.med.uni-giessen.de  
Florian Wagenlehner, **email:** Florian.Wagenlehner@chiru.med.uni-giessen.de

**Keywords:** chronic prostatitis/chronic pelvic pain syndrome (CP/CPPS); liquid biopsies; estradiol; estrogen receptor; epigenetic inactivation

**Received:** October 05, 2017

**Accepted:** February 24, 2018

**Published:** April 13, 2018

**Copyright:** Nesheim et al. This is an open-access article distributed under the terms of the Creative Commons Attribution License 3.0 (CC BY 3.0), which permits unrestricted use, distribution, and reproduction in any medium, provided the original author and source are credited.

### ABSTRACT

**Chronic prostatitis/chronic pelvic pain syndrome (CP/CPPS) is associated with urinary tract symptoms and hormonal imbalances amongst others. The heterogeneous clinical presentation, unexplored molecular background and lack of prostate biopsies complicate therapy. Here, using liquid biopsies, we performed a comprehensive translational study on men diagnosed with CP/CPPS type III ( $n = 50$ ; median age 39.8, range 23–65) and age-matched controls ( $n = 61$ ; median age 36.8, range 20–69), considering biochemical parameters of blood and ejaculates, and epigenetic regulation of the estrogen receptor genes (*ESR1* and *ESR2*) in leukocytes isolated from blood (systemic regulation) and in somatic cells isolated from ejaculates (local regulation). We found elevated  $17\beta$ -estradiol ( $E_2$ ) levels in seminal plasma, but not in blood plasma, that was significantly associated with CP/CPPS and impaired urinary tract symptoms. In ejaculated somatic cells of CP/CPPS patients we found that *ESR1* and *ESR2* were both significantly higher methylated in CpG-promoters and expressionally down-regulated in comparison to controls. Mast cells are reported to contribute to CP/CPPS and are estrogen responsive. Consistent with this, we found that  $E_2$ -treatment of human mast cell lines (HMC-1 and LAD2) resulted in altered cytokine and chemokine expression. Interestingly, in HMC-1 cells, possessing epigenetically inactivated *ESR1* and *ESR2*,  $E_2$ -treatment led to a reduced transcription of a number of inflammatory genes. Overall, these data suggest that elevated local  $E_2$  levels associate with an epigenetic down-regulation of the estrogen receptors and have a prominent role in CP/CPPS. Investigating  $E_2$  levels in semen could therefore serve as a promising biomarker to select patients for estrogen targeted therapy.**

## INTRODUCTION

The prostate is particularly susceptible to disease, with ~90% of men developing histological benign prostatic hyperplasia (BPH) by the age of 80 [1], ~11.6% of all men developing prostate cancer (PCa) during their lifetime [2], and up to 16% developing chronic prostatitis/chronic pelvic pain syndrome (CP/CPPS) [3]. CP/CPPS generally receives less attention and remains poorly understood, even though it has a high disease burden. CP/CPPS is characterized by pelvic pain, ongoing urinary tract symptoms without detectable pathogens or identifiable aetiology, and various other signs and symptoms, assigning the syndrome to the class of chronic inflammatory and perhaps autoimmune disorders [4].

There is currently no reliable biomarker for CP/CPPS. Instead, classification as inflammatory (IIIa: leukocytes) or non-inflammatory (IIIb: no leukocytes) is based on upon the presence or absence of leukocytes in expressed prostatic secretions or post prostatic massage urine [5]. However, this classification does not have implications for differential treatment [6], nor does the presence of leukocytes in prostatic secretions correlate with severity of symptoms [7]. Instead, it was the introduction of a multimodal treatment system (UPOINT) with symptom-specific patient stratification that has led to significant advances in disease management [8, 9], indicating that multiple disease entities could be concealed behind the diagnosis CP/CPPS. Nevertheless, the lack of reliable biomarkers and well-established pathomechanisms are the reasons why the syndrome is treated in a phenotype-directed manner. The high prevalence and morbidity of CP/CPPS, as well as the possible link to PCa and/or BPH upon aging, stresses the need for a deeper understanding of the underlying mechanisms.

Steroid sex hormones, particularly testosterone and estradiol ( $E_2$ ), play key roles in the development and maintenance of the reproductive systems. The synthesis of estrogens from androgens is catalyzed by aromatase. Estrogen action in the male is viewed in at least two different ways: systemic endocrine effects acting through the pituitary gland to indirectly lower androgens and local effects that directly target prostate tissue by estrogen receptors [10]. Androgen and estrogen signaling plays a significant role in normal and abnormal growth of the prostate gland [10]. Studies examining the steroid hormones in CP/CPPS, however, are equivocal, reporting either elevated systemic testosterone and unchanged estradiol levels [11], or elevated systemic estradiol levels, but unchanged testosterone levels [12]. In the latter, it is interesting to note that this patient cohort also had an elevated body mass index, so adipose aromatase activity could account for the elevated systemic estradiol levels.

Prostate biopsies in patients with CP/CPPS are not routinely performed, which has led to the development

of multiple animal models such as experimental autoimmune prostatitis (EAP). These include mouse models of chronic prostatic inflammation induced by immunization with prostate antigen (PAG) [13], rat models with chronic inflammation induced by combined testosterone and  $E_2$  treatment [14], or a transgenic mouse model with aromatase (ARO+) over-expression leading to chronic prostatitis and prostate pre-malignancy with increased mast cell infiltration [15]. Further studies have subsequently linked mast cell infiltration and prostatic estrogen dominance to prostate cancer [16]. Elevated tryptase levels were also present in the expressed prostatic secretions (EPS) of CP/CPPS patients [17], underscoring the clinical significance of mast cells and drawing attention to estrogen as a potential mediator of both PCa and CP/CPPS.

At least two compounds targeting estrogen signaling have been studied for treatment of CP/CPPS. Patients were shown to profit by treatment of Mepartricin, an estrogen reabsorption inhibitor [18], but also from quercetin, a plant isoflavonoid with anti-estrogenic properties and a ~9 fold higher affinity to estrogen receptor beta ( $ER\beta$ , *ESR2* gene) than to ER-alpha ( $ER\alpha$ , *ESR1* gene) [19–21]. It is interesting to note that  $ER\beta$  is a potent suppressor of inflammation in multiple tissues/organs, including the brain and bowel [22, 23]. Hence, an aberrant and increased prostatic  $ER\alpha:ER\beta$  ratio may contribute to CP/CPPS.

Administration of the histone deacetylase (HDAC) inhibitor MS-275 led to EAP attenuation in a rat model [24], highlighting the epigenetic dimensions of the inflammatory response as a possible target for epigenetic drugs. Our group recently reported epigenetic inactivation of CXCR4 (C-X-C motif receptor of the chemokine CXCL12/SDF1) in CP/CPPS patients' liquid biopsies [25], showing that CP/CPPS is accompanied by systemic and organ-specific epigenetic changes. Here, we extend upon this and examine in a prospective analytical comparative study whether epigenetic aberrations of the sex hormone receptor genes *ESR1*, *ESR2* and *AR* (androgen receptor) occur in CP/CPPS and associate with the clinical phenotype. This study was approved by the Ethics Commission of the Medical Faculty of the Justus-Liebig-University Giessen (ethical votes, AZ.: 55/13; AZ.: 123/12) and all subjects provided written informed consent. To provide mechanistic insights for our findings in patients' liquid biopsies, and to explore the role of mast cells and estrogen in CP/CPPS, we studied human mast cells and the influence of estrogen on their inflammatory profile. Overall, we provide new molecular insights into the chronification of prostatitis and demonstrate that seminal plasma estradiol levels and epigenetic state of estrogen receptor genes, respectively, may be a novel diagnostic tool for CP/CPPS patients that could be used to select patients for targeted therapy.

## RESULTS

### Increased concentration of 17 $\beta$ -estradiol in seminal plasma is associated with CP/CPPS and impaired urogenital tract symptoms

Whole blood and semen samples from CP/CPPS patients and healthy volunteers were analyzed in order to identify CP/CPPS associated systemic and local changes in sex hormone signaling (Figure 1). The median age of CP/CPPS patients was 39.76 years (range 23–65). As hormonal balance and imbalance, respectively, are age-dependent, an age-matched control cohort (median age 36.77, range 20–69) of healthy men without any preexisting urological conditions was also gathered (Figure 1A.1). By considering CP/CPPS patients and controls together as well as by analyzing them separately, we did not find a correlation between age and 17 $\beta$ -estradiol ( $E_2$ ) concentrations in blood plasma (Figure 1A.2). A low positive correlation between age and  $E_2$  in seminal plasma ( $R^2 = 0.145$ ,  $p = 0.0316$ ) was found exclusively in the CP/CPPS patient group (Figure 1A.3). Interestingly, only CP/CPPS patients, but not healthy controls, exhibited a strong correlation between  $E_2$  levels in blood and in seminal plasma ( $R^2 = 0.35840$ ,  $p = 0.0008$ ) (Figure 1A.4). CP/CPPS patients and controls did not differ in blood  $E_2$  levels ( $36.45 \pm 1.71$  versus controls:  $36.96 \pm 1.73$  pg/ml;  $p > 0.05$ ) (Figure 1B.1). However,  $E_2$  levels in seminal plasma were significantly increased in CP/CPPS patients compared to controls (CP/CPPS:  $100.5 \pm 3.72$  versus controls:  $84.57 \pm 4.09$  pg/ml;  $p \leq 0.01$ ) (Figure 1B.2). Further, the seminal plasma  $E_2$  concentrations were analyzed in patients and controls with regard to the chronic prostatitis symptom index (CPSI), an evaluation system for the severity of CP/CPPS which comprises the subscores for urinary tract (voiding) symptoms, pain and quality of life. Increased  $E_2$  concentrations in seminal plasma correlated with impaired urinary tract symptoms, when CP/CPPS patients and controls were analyzed together ( $R^2 = 0.16$ ;  $p = 0.0037$ ) (Figure 1B.3). However, this trend was less pronounced in the individual groups (Figure 1B.4). The quality of life and pain scores, on the other hand, were not correlated with  $E_2$  concentrations in seminal plasma (Figure 1B.5; a scatter plot for the CPSI pain subscore and  $E_2$  is shown; see also Supplementary Figure 1).

Testosterone was routinely measured in the blood of CP/CPPS patients: Older patients ( $\geq 40$  years) possessed significantly lower systemic testosterone levels compared to younger patients ( $\geq 40$ y:  $315 \pm 140$  versus  $< 40$ y:  $458 \pm 288$  pg/ml;  $p = 0.010$ ) (Figure 1C.1). A significant positive correlation between blood testosterone and blood  $E_2$  was found in both age groups, whereby the correlation was more pronounced in younger patients ( $< 40$ y:  $R^2 = 0.37$ ,  $p = 0.0044$ ;  $\geq 40$ y:  $R^2 = 0.2483$ ,  $p = 0.0155$ ; Figure 1C.2). In younger patients, also a significant positive correlation

between blood testosterone and  $E_2$  in seminal plasma was found ( $R^2 = 0.2953$ ,  $p = 0.0363$ ; Figure 1C.3).

### Semen samples are a source of inflammatory markers of CP/CPPS

Ejaculates of CP/CPPS patients and healthy controls were compared with regard to routine semen parameters (Supplementary Figure 1). In particular, significant impairments in ejaculate volume, sperm concentration, total number, motility, morphology and vitality of sperm cells and pH-value could be evaluated in CP/CPPS patients in comparison to healthy controls (Supplementary Figure 1). These subsequent results confirmed our previously described and discussed observations in CP/CPPS patients [25] and emphasized again the relation between CP/CPPS and impaired semen parameters.

Seminal zinc, which is important for sperm motility amongst other functions, is mainly derived from prostatic secretions. The prostate fluid is known to be rich in citric acid, and the solubility of zinc increases with an increasing acidity. As CP/CPPS patients' seminal plasma exhibited significantly decreased (more acidic) pH-values in comparison to controls (Figure 2A.1), we analyzed zinc levels in seminal plasma and its correlation to pH-values. Zinc concentrations per se were not changed in CP/CPPS in comparison to controls (Figure 2A.2). However, a significant negative correlation between zinc and pH-values could be observed in seminal plasma of CP/CPPS patients ( $R^2 = -0.326$ ,  $p < 0.0001$ ) as well as controls ( $R^2 = -0.2878$ ,  $p = 0.0083$ ) (Figure 2A.3).

Human semen contains besides spermatozoa and immature germ cells also a variety of somatic cells, including epithelial cells from the male tract and leukocytes. Our previous study demonstrated that ejaculated somatic cells from CP/CPPS patients exhibited epigenetic aberrations in *CXCR4* gene, a chemokine receptor often dysregulated in human tumors [25]. In order to get a more detailed profile of the white blood cells in ejaculates, we performed the peroxidase-positive leukocyte test and, additionally, an analysis of the expression of genes typical for inflammatory cells. We found that the number of peroxidase positive leukocytes was significantly increased in patients (Figure 2B.1). Somatic cells from the ejaculates of both CP/CPPS patients and healthy controls exhibited expression of aromatase (*ARO*, also estrogen synthase, is expressed in white blood cells), chymase (*CMA1*, mast cell marker) and *PU.1* (transcription factor of lymphoid and myeloid hematopoietic cells) at different levels (Figure 2B.2, 2B.3 and 2B.4). *ARO* and *CMA1* gene expression levels were comparable in CP/CPPS patients and controls ( $p > 0.05$ ) (Figure 2B.2 and 2B.3), whereas *PU.1*, although also not significantly different, showed a trend towards lower expression in patients (Figure 2B.4). The concentration of the chemokine interleukin-8 (IL-8) was also measured in

seminal plasma samples to evaluate the relationship of CP/CPPS to inflammation. While not significant, a trend for increased IL-8 levels was detected in CP/CPPS patients compared to controls ( $p > 0.05$ ) (Figure 2C.1). However, by stratifying all studied men into low ( $<3,000$  pg/ml) or high ( $\geq 3,000$  pg/ml) seminal plasma IL-8 concentrations, we found that older men possessed significantly higher IL-8 concentrations (Figure 2C.2). High IL-8 levels ( $\geq 3,000$  pg/ml) in seminal plasma were also significantly associated with high  $E_2$  levels in blood, but not in seminal plasma (Figure 2C.3 and 2C.4).

Our data show that ejaculates from both CP/CPPS patients and controls contain a considerable number of somatic cells expressing genes characteristic only for inflammatory i.e. white blood cells (leukocytes). In addition to impaired semen parameters, which have been previously associated with CP/CPPS, the somatic cells and leukocytes isolated from ejaculates may serve as a novel source of molecular information about the inflammatory state in the prostate of these patients. We also show that IL-8-concentrations in seminal plasma increase with age, independent from CP/CPPS diagnosis. As such, IL-8

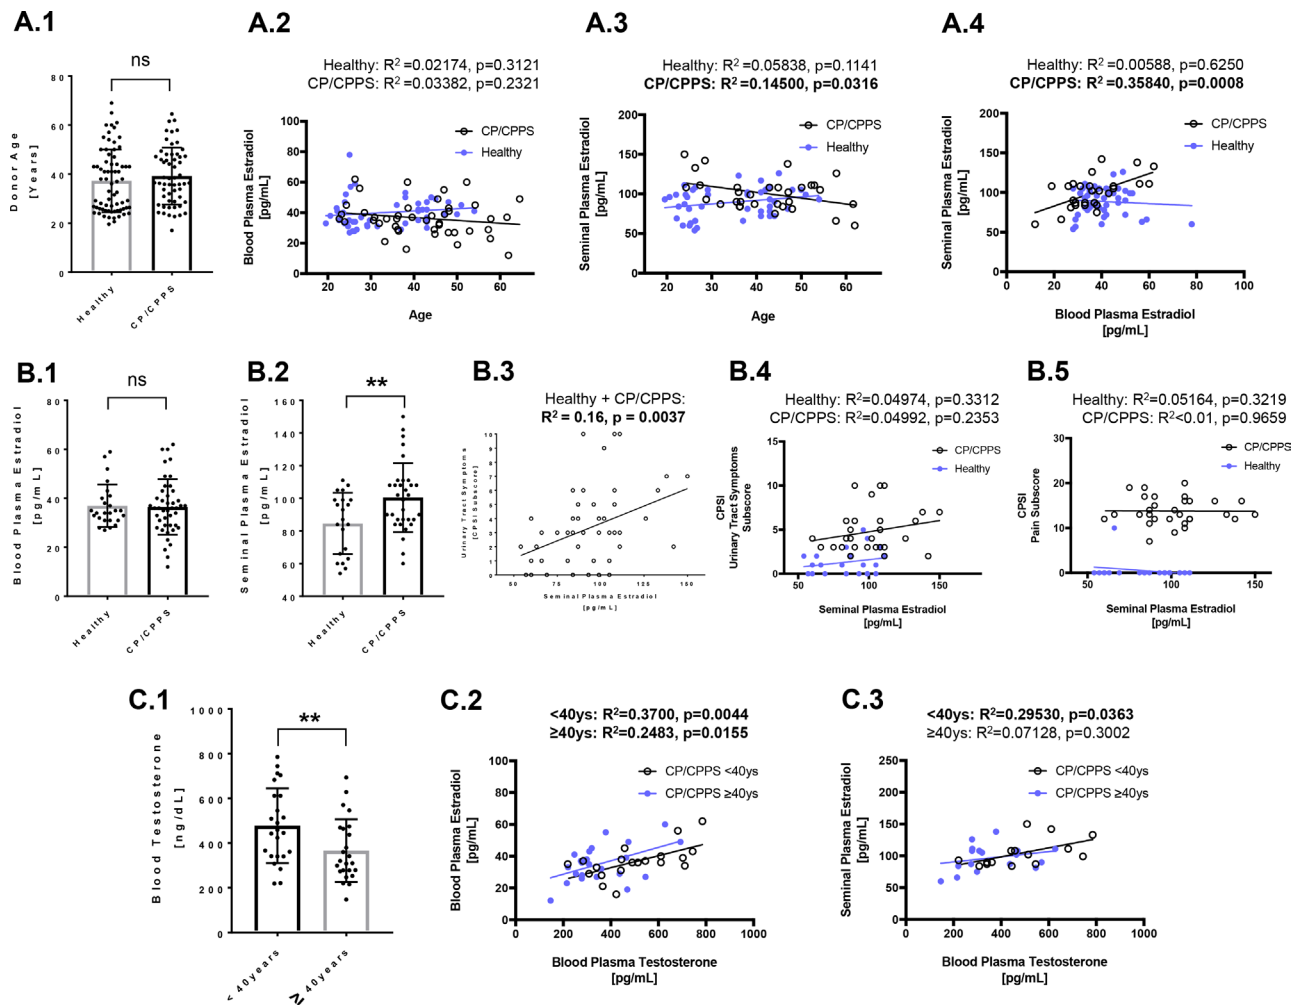

**Figure 1: Characterization of analyzed cohorts with regard to estradiol ( $E_2$ ) and testosterone levels in blood and seminal plasma.** (A) Age-matched cohorts of healthy men and CP/CPPS patients (A.1) were analyzed regarding the interdependence of systemic (in peripheral blood) and local (in seminal plasma)  $E_2$  levels to age and to one another. In both, controls (blue filled circles) and patients (empty circles) blood  $E_2$  was not correlated to age (A.2). In patients, but not in controls, a moderate significant correlation was found between seminal plasma  $E_2$  and age (A.3). In patients, but not in controls, a highly significant correlation between seminal plasma  $E_2$  and blood  $E_2$  was found (A.4); (B) By comparing controls and patients with regard to systemic and local  $E_2$  levels, a significant increase of  $E_2$  were detected in seminal plasma of CP/CPPS men, whereas  $E_2$  levels in blood were similar (B.1 and B.2). Striking, considering controls and patients together, a highly significant correlation between seminal plasma  $E_2$  and deterioration of urinary tract symptoms was found (B.3). However, in a separated analysis of controls and patients this correlation was less obvious (B.4). No correlation was found between the pain subscore and seminal plasma  $E_2$  (B.5); (C) Testosterone was routinely measured in CP/CPPS patients' peripheral blood. Older patients ( $\geq 40$  years) possessed significantly reduced testosterone levels than younger patients ( $<40$  years) (C.1). Young as well as older patients exhibited a significant positive correlation between  $E_2$  and testosterone in blood (C.2). In young patients' seminal plasma  $E_2$  and testosterone were also significantly correlated, whereas in older patients this correlation was absent (C.3). Abbreviations: \*\* $p \leq 0.01$ ; ns: not significant ( $p > 0.05$ ); CPSI: chronic prostatitis symptom index.

would be an unreliable parameter to assess the extent of inflammation in CP/CPPS patients.

### Local epigenetic down-regulation of estrogen receptors *ESR1* and *ESR2* is associated with elevated estrogen levels in seminal plasma of CP/CPPS patients

Significantly elevated levels of  $E_2$  were found in seminal plasma of CP/CPPS patients and were positively correlated to urinary tract symptoms (Figure 1B.2 and 1B.3). In order to determine potential molecular reasons resulting in the local  $E_2$ -excess in CP/CPPS patients, we analyzed somatic cells from ejaculates for gene expression and promoter CpG-methylation of the estrogen receptors,

*ESR1* and *ESR2*, as well as the androgen receptor (*AR*). Hereafter, median values and ranges (minimum to maximum) for relative gene expression (delta-delta ct value) and promoter methylation (percentage of cells fully methylated in analyzed CpGs in *ESR1*, *ESR2* and *AR* promoters) are given. Transcription of both *ESR1* and *ESR2* were significantly decreased in CP/CPPS patients (*ESR1*: 125.9 (range 0 to 2,846.6); *ESR2*: 379.7 (range 0 to 4,933.3)) in comparison to healthy controls (*ESR1*: 537.5 (range 0 to 6,746.3); *ESR2*: 955.4 (range 70.3 to 5,226);  $p = 0.019$  and  $p = 0.003$ , respectively; Mann-Whitney  $U$  test), whereas *AR* gene expression was not significantly changed (CP/CPPS: 7,454.2 (range 0 to 95,953); controls: 14,698 (range 815.6 to 10,8074);  $p > 0.05$ ; Mann-Whitney  $U$  test) (Figure 3A.1). Methylation analyses revealed

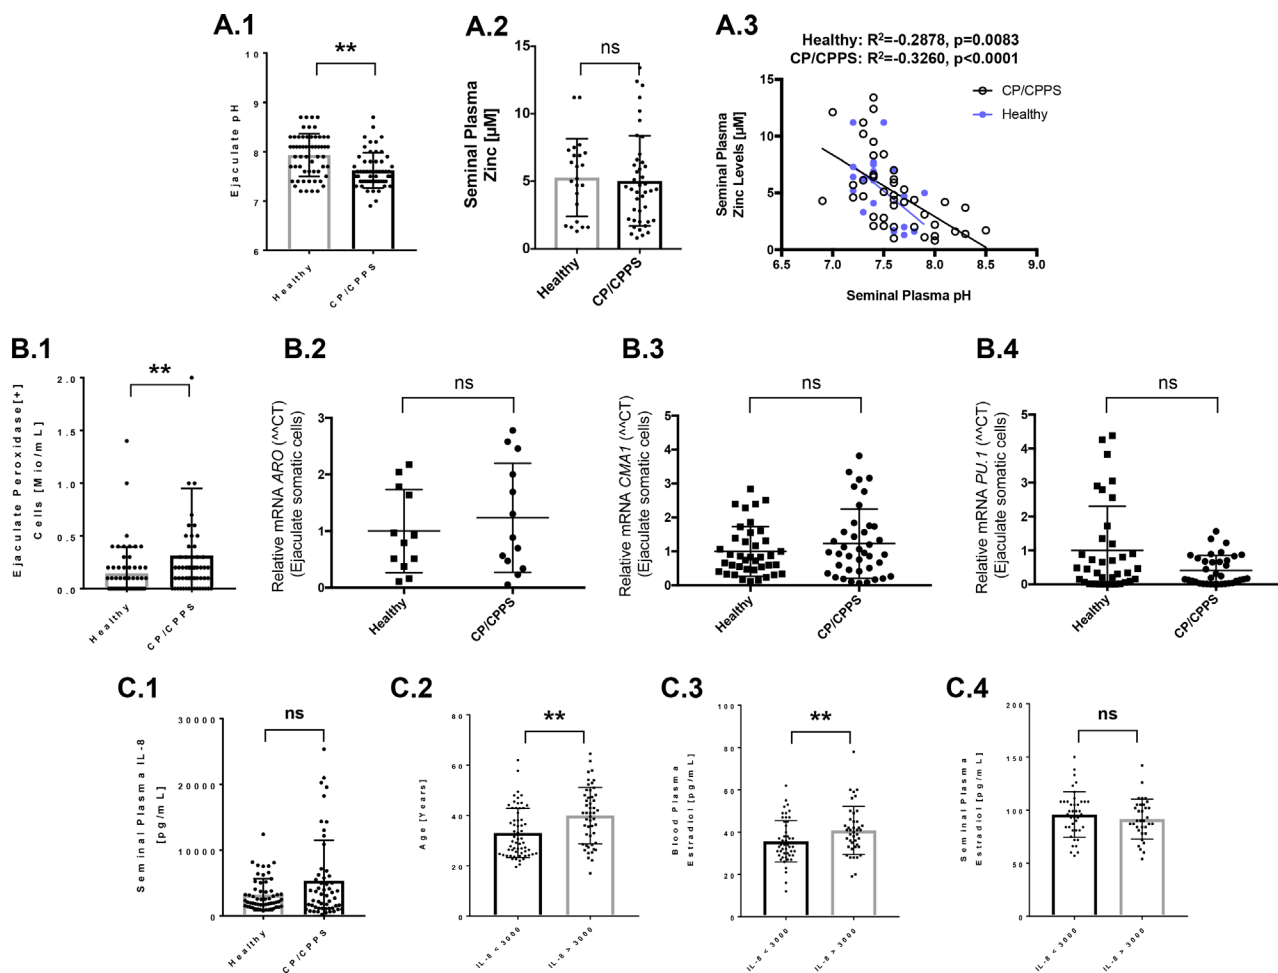

**Figure 2: Analysis of semen parameters susceptible to changes under inflammatory conditions and expression of inflammation factors in ejaculated somatic cells.** (A) CP/CPPS patients' semen possessed significantly reduced pH-values (A.1). Seminal plasma zinc levels were comparable between controls and patients (A.2). In both, controls and patients, semen zinc concentrations were highly significantly negative correlated to pH-values (A.3); (B) CP/CPPS patients' semen possessed significantly increased number of peroxidase positive cells (leukocytes; represent the majority of somatic cells in ejaculates) (B.1). In ejaculated somatic cells, aromatase (*ARO*), mast cell chymase (*CMA1*) and *PU.1* (transcription factor of lymphoid and myeloid hematopoietic cells) mRNAs levels were not significantly different between CP/CPPS and controls (B.2, B.3 and B.4); (C) Interleukin 8 (IL-8) levels did not differ significantly between controls and patients, although a trend for increased IL-8 was visible in CP/CPPS (C.1). Proband possessing very high IL-8 levels in semen (at cut-off of 3,000 pg/ml) were significantly older (C.2) and exhibited significantly increased  $E_2$  levels in blood (C.3), but not in seminal plasma (C.4). Abbreviations: \*\* $p \leq 0.01$ ; ns: not significant ( $p > 0.05$ ).

that *ESR1* and *ESR2* promoters were both significantly more methylated in ejaculated somatic cells of CP/CPPS patients (*ESR1*: 1.25% (range 0.25 to 24.5%); *ESR2*: 2% (range 0.5 to 31.5%)) than in controls (*ESR1*: 1% (range 0 to 5.25%); *ESR2*: 1% (range 0.5 to 6.13%);  $p = 0.004$  and  $p < 0.001$ , respectively; Mann–Whitney  $U$  test), whereas the methylation status of *AR* was only slightly changed (CP/CPPS: 2.4% (range 1.6 to 7.4%); controls: 1.8% (range 1.2 to 7.2%);  $p = 0.031$ ; Mann–Whitney  $U$  test) (Figure 3A.2). Particularly notable was a remarkable high methylation degree of *ESR1* and *ESR2* promoters (up to 20–30%) in a number of CP/CPPS cases, whereas the controls were inconspicuous (Figure 3A.2).

Leukocytes isolated from blood did not differ significantly ( $p > 0.05$ ) between CP/CPPS patients and controls with regard to *ESR1* and *AR* gene expression (CP/CPPS: 11 (range 0 to 206.7) and 455 (range 40.8 to 21,718); controls: 9.4 (range 0 to 260.5) and 2,378 (range 11.9 to 12,988), respectively) (Figure 3B.1). However, CP/CPPS patients exhibited a significantly decreased *ESR2* expression (25.9 (range 1.1 to 413)) in comparison to controls (74.7 (range 0.6 to 4,284);  $p = 0.016$ , Mann–Whitney  $U$  test) (Figure 3B.1). Methylation analyses revealed a significant difference in *ESR1* promoter (CP/CPPS: 1.25% (range 0 to 7.5%); controls: 1.5% (range 0.75 to 5%);  $p = 0.007$ , Mann–Whitney  $U$  test), but not in *ESR2* (CP/CPPS: 1.1% (range 0.5 to 7.4%); controls: 1.3% (range 0.9 to 2.9%);  $p > 0.05$ ) and *AR* promoter (CP/CPPS: 2.2% (range 1.4 to 4.2%); controls: 2.2% (range 1.6 to 7.6%);  $p > 0.05$ ) (Figure 3B.2).

In order to show the effect of *ESR1* and *ESR2* promoter methylation and demethylation on gene expression, prostate cancer cell lines LNCaP, DU145 and PC3 were treated with 5-aza-2'-deoxycytidine (AZA). AZA is a cytosine analog that inhibits the DNA methyltransferase activity and induces demethylation and reactivation of silenced genes. In PC3 cells, which possessed a hypermethylated *ESR1* promoter (Figure 3C.1) and had no *ESR1* expression, AZA treatment led to re-expression of *ESR1* (Figure 3C.2). In the same way, in LNCaP cells possessing a hypermethylated *ESR2* promoter (Figure 3C.1) and gene silencing, AZA treatment led to re-expression of *ESR2* (Figure 3C.2). These results confirm that the expression of *ESR1* and *ESR2* genes is influenced by promoter methylation.

So, our findings in ejaculated somatic cells showed that a local (in male genital compartment) epigenetic down-regulation of estrogen receptor genes *ESR1* and *ESR2* was characteristic for CP/CPPS patients and associated with local estrogen excess in these patients. These data suggest that *ESR1* and *ESR2* methylation and expression status in ejaculated somatic cells may be suitable molecular markers for CP/CPPS. In contrast, the *AR* was not changed and hence would be less suitable. From our analyses in blood we could not obtain a coherent picture: CP/CPPS patients showed a lower transcription

level of *ESR2* and, however, a decreased *ESR1* methylation compared to healthy controls.

### Deterioration of CP/CPPS symptoms and elevated C-reactive protein in patients with advanced age

In order to evaluate, whether age and the associated hormonal changes that occur upon aging, affect the disease severity and symptoms of CP/CPPS, we stratified patients into two age-groups (separated using the median cohort age;  $<40$  years *versus*  $\geq 40$  years) and analyzed with regard to C-reactive protein (CRP, a marker of inflammation), prostate specific antigen (PSA) and disease severity based on CPSI and IPSS (international prostate symptom score) questionnaires. CRP was significantly affected, with older patients having significantly elevated levels of CRP in blood ( $p \leq 0.01$ ) (Figure 3D.1). PSA levels and the CPSI score were not significantly different in older patients compared to younger ones ( $p > 0.05$ ) (Figure 3D.2 and 3D.3). However, the IPSS questionnaire score was also significantly increased in older CP/CPPS patients ( $p \leq 0.01$ ; Figure 3D.4).

### Impact of mast cells in chronic inflammation of the prostate

Mast cells are a type of leukocytes with myeloid origin, which are essential in mediating inflammatory processes, regulating a variety of both adaptive and innate immune responses [26]. Prostate tumors, which are frequently accompanied by prostatic inflammation, contain significantly elevated numbers of mast cells at the tumor interface, with the tumor stroma promoting increased mast cell recruitment and activation [16]. Consistent with this and other previous studies, we found the presence of mast cells in benign prostate hyperplasia (BPH) and prostate carcinoma (PCa) tissue samples, demonstrated by the presence and release of the mast specific protease, tryptase (Figure 4A). PCa samples ( $n = 4$ ) showed a slightly increased number of mast cells in comparison to BPH ( $n = 4$ ) (PCa:  $28.7 \pm 2.8$  versus BPH:  $21.7 \pm 1.2$ ,  $p < 0.05$ ,  $t$ -test) (Figure 4A).

### Mast cell lines HMC-1 and LAD2 differ in expression and promoter methylation of *ESR1* and *ESR2* genes

In prostate tumors it has also been demonstrated that mast cell recruitment and activation is induced by estradiol ( $E_2$ ) [16]. Our current results revealing increased  $E_2$  levels in the seminal plasma of CP/CPPS patients (Figure 1B.2), along with the expression of mast cell chymase in the ejaculated somatic cells of patients and controls (Figure 2B.3), suggest an involvement of mast cells in CP/CPPS. In order to evaluate the effect of increased  $E_2$  on mast cell

function we analyzed two human mast cell lines, HMC-1 (progenitor-like) and LAD2 (mature), before and after treatment with high dose (100 nM) E<sub>2</sub> for 24 hours. Both lines express the two estrogen receptors, and our initial analyses showed that in untreated HMC-1 cells, *ESR1* and *ESR2* promoters were hypermethylated (68% and 92%,

respectively) and gene transcriptions were accordingly low (Figure 4B.1 and 4B.2). These data from the HMC-1 cells are reminiscent of what is detectable in ejaculated somatic cells from CP/CPSP patients, where significantly lower expression of *ESR1* and *ESR2* and increased promoter methylation is observed in comparison to healthy controls

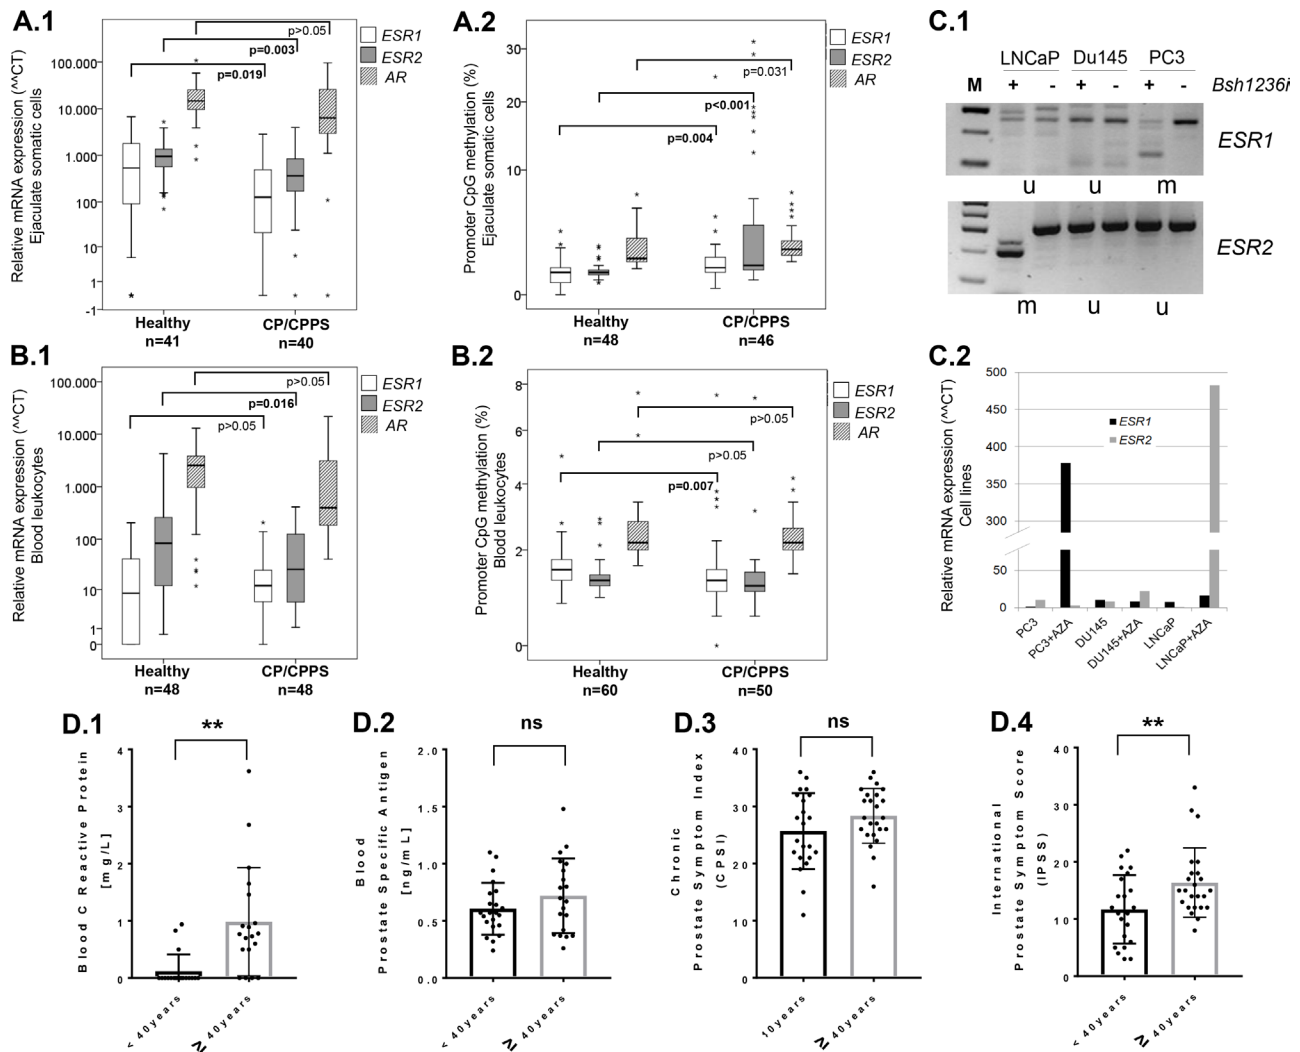

**Figure 3: Epigenetic down-regulation of estrogen receptors *ESR1* and *ESR2* in CP/CPSP and deterioration of CP/CPSP symptoms in patients with advanced age.** (A) A significant decrease of expression of both estrogen receptor genes (*ESR1* and *ESR2*) was detected in somatic cells isolated from ejaculates of CP/CPSP patients in comparison to controls (A.1). By analyzing the promoter methylation of *ESR1* and *ESR2* in ejaculated somatic cells, a highly significant increase of cells having methylated *ESR1* and *ESR2* promoters was found in the CP/CPSP group (A.2). In contrast, androgen receptor (*AR*) gene expression and promoter methylation did not differ much between controls and patients (A.1 and A.1); (B) Leukocytes isolated from blood of CP/CPSP and controls did not differ in gene expression of *ESR1* (B.1). CP/CPSP patients exhibited a reduced *ESR2* and *AR* expression, whereby for *ESR2* the difference was statistically significant (B.1). Methylation data showed a significant decrease of cells with methylated *ESR1* promoter in CP/CPSP patients' blood leukocytes, whereas *ESR2* and *AR* promoters were comparable between patients and controls (B.2); (C) Prostate cancer cell lines LNCaP, DU145 and PC3 were analyzed by COBRA in *ESR1* and *ESR2* promoters. PC3 cells exhibited methylation (m) in *ESR1* promoter (Bsh1236i (CGCG)-specific restriction bands visible under "+"), whereas the other two were unmethylated (u) (C.1, upper gel picture). *ESR2* promoter was methylated in LNCaP cells and unmethylated in DU145 and PC3 (C.1, bottom gel picture). Treatment with 5-aza-2'-deoxycytidine (+AZA) led to re-expression of *ESR1* in PC3 cells and of *ESR2* in LNCaP cells (C.2); (C) Older CP/CPSP patients (≥40 years) exhibited extremely increased levels of CRP (C reactive protein) (D.1) and significantly higher IPSS (international prostate symptom score) than younger patients (<40 years) (D.4). The CPSI (chronic prostatitis symptom index), however, did not differ between younger and older patients (D.3). Prostate specific antigen (PSA) was also not significantly different in the blood of older and younger patients (D.2). Abbreviations: \*\* $p \leq 0.01$ ; ns: not significant ( $p > 0.05$ ).

(Figure 3A.1 and 3A.2). In contrast, in untreated LAD2 cells, *ESR1* and *ESR2* genes were transcribed at high levels and the promoters were almost unmethylated (2% and 1%) (Figure 4B.1 and 4B.2). The short term (24 h)  $E_2$  treatment led to a halving of *ESR1* and *ESR2* gene expression in LAD2, and of *ESR2* in HMC-1 cells (Figure 4B.1). No changes were found after 24 h  $E_2$  treatment with regard to *ESR1* and *ESR2* promoter methylation in HMC-1 as well as in LAD2 cells (Figure 4B.2).

### Increased estrogen levels lead to suppression of cytokines and chemokines in HMC-1 and their activation in LAD2

The expression of a panel of 84 cytokines and chemokines was examined in untreated and  $E_2$ -stimulated HMC-1 and LAD2 cells using the RT<sup>2</sup> Profiler PCR array “Human cytokines and chemokines” (Qiagen). In untreated HMC-1 cells, the majority of genes (52 out of 84, 62%) were expressed at high levels (delta Ct  $\leq$  10 in qPCR), whereas in untreated LAD2, only 27 out of 84 genes (32%) had a high expression and the majority (68%) had low expression (delta Ct  $>$  10) (Figure 4C.1). Stimulation with  $E_2$  had opposite effects in these two lines (Figure 4C.2 and 4C.3). While in HMC-1 cells the majority of  $E_2$ -responsive genes was transcriptionally suppressed (21 out of 23 responsive genes were at least 2-fold down-regulated), a number of genes in LAD2 cells showed increased expression (15 out of 18 responsive genes were at least 2-fold up-regulated). Among the  $E_2$ -suppressed genes in HMC-1 cells, *XCL1*, *CCL18*, *CXCL2* and *BMP7* showed the strongest (6- to 9- fold) down-regulation (Figure 4C.3 and Supplementary Figure 2). Among  $E_2$ -activated genes in LAD2 cells, *IL-8*, *CXCL2*, *IL22*, *IL21*, *MSTN*, *IFNG* and *CSF3* showed the strongest (4- to 30-fold) up-regulation (Figure 4C.2 and Supplementary Figure 2).

Altogether, different promoter methylation states and herewith associated basal activities of *ESR1* and *ESR2* in HMC-1 (progenitor-like) and LAD2 cells (mature) associated with very different expression profiles of cytokines and chemokines before and after  $E_2$  stimulation. Specifically, in untreated HMC-1 cells, the majority of analyzed inflammatory genes was already actively transcribed, while, in contrast, in control LAD2 cells the majority of genes was silenced or transcribed at low levels. Treatment with  $E_2$  led in HMC-1 mainly to immune-suppression, whereas LAD2 cells reacted with activation of immune factors.

### The methylation profile of HMC-1 and LAD2 cells is similar and does not change under short term estrogen stimulation

The methylation profile of 24 genes with well documented roles in cytokine biosynthesis was evaluated

in untreated and  $E_2$ -stimulated (100 nM, 24 hours) mast cells using the EpiTect Methyl II Signature PCR array “Human cytokine production” (Qiagen) and pyrosequencing (Supplementary Figure 3). LAD2 and HMC-1 cells were both found to be hypermethylated in the promoters of *ELANE*, *FOXP3*, *INHA*, *INHBA*, *SMAD3*, *CXCL12* and *IL-13* (17% to 100%) (Supplementary Figure 3). Additionally, LAD2 cells were also hypermethylated in the *STAT5A* promoter, and HMC-1 cells in *IGF2BP2*, *ESR1*, *ESR2* and *AR* promoters (Supplementary Figure 3). All other genes analyzed were unmethylated.  $E_2$  stimulation did not change the methylation levels of the genes examined, except in *BCL3* (0% to 61%) and *TLR2* (0% to 56%) in HMC-1 cells, and *GATA3* (51% to 0%) and *INHA* (66% to 28%) in LAD2 cells.

## DISCUSSION

CP/CPPS is a disease of all ages and patients are characterized by their symptoms. In a large international study comprising 1,563 CP/CPPS patients, the mean age was 47.2 years (SD - 15.7 years) [27]. In this study the included patients were somewhat younger, but generally matched other published cohorts. Decreasing testosterone levels with age [28] represent a possible confounding factor in a study with a wide age range as ours. This fact has been addressed by comparing with an age matched healthy control population.

The present results demonstrate that estradiol ( $E_2$ ) excess in seminal plasma is a characteristic of CP/CPPS patients and correlates significantly with the NIH-CPSI urinary tract symptom subscore. The increase in local estrogen levels could be explained by elevated aromatase expression within the reproductive tissues of CP/CPPS patients as this was not apparent in somatic cells isolated from ejaculates. Interestingly, in addition to locally elevated  $E_2$  levels, we found in ejaculated somatic cells of CP/CPPS patients a significant down-regulation of *ESR1* and *ESR2* gene expression, which associated with a significant higher methylation of *ESR1* and *ESR2* promoters. It remains unclear, whether these epigenetic changes affect the leukocytes in ejaculates, which represent the majority of somatic cells in semen, or other somatic cells (e.g. epithelial cells from urogenital tract), which can also be present even if in low numbers. Further studies should address and clarify this issue. However, we could detect a significant higher number of peroxidase-positive cells (leukocytes) in CP/CPPS patients' ejaculates than in controls. Moreover, in CP/CPPS patients, but not in controls, a significant correlation between estradiol levels in seminal plasma and in blood was detected, indicating a CP/CPPS specific systemic and local deregulation of  $E_2$ . These novel findings in CP/CPPS patients demonstrate that estrogen and estrogen receptors' deregulation may play an important role in the chronification of prostatitis and, together with our previous results [25], suggest that



semen is a suitable source for development of diagnostic biomarkers for CP/CPPS.

In contrast to semen, there were no significant differences detectable with regard to systemic (in blood) estradiol levels between CP/CPPS and controls. We found that regardless of the presence of CP/CPPS, men exhibiting high IL-8 levels in seminal plasma (>3,000 pg/ml vs. <3,000 pg/ml) were on average significantly older and

had significantly increased blood estradiol concentrations. Thus, IL-8 seems to be an age-dependent factor and must be used in the clinical practice with caution. By analyzing leukocytes isolated from blood, we found a significantly decreased methylation in *ESR1* promoter in CP/CPPS, but we did not detect any changes in *ESR1* gene expression. Furthermore, blood leukocytes from CP/CPPS patients possessed a significantly decreased *ESR2* expression,

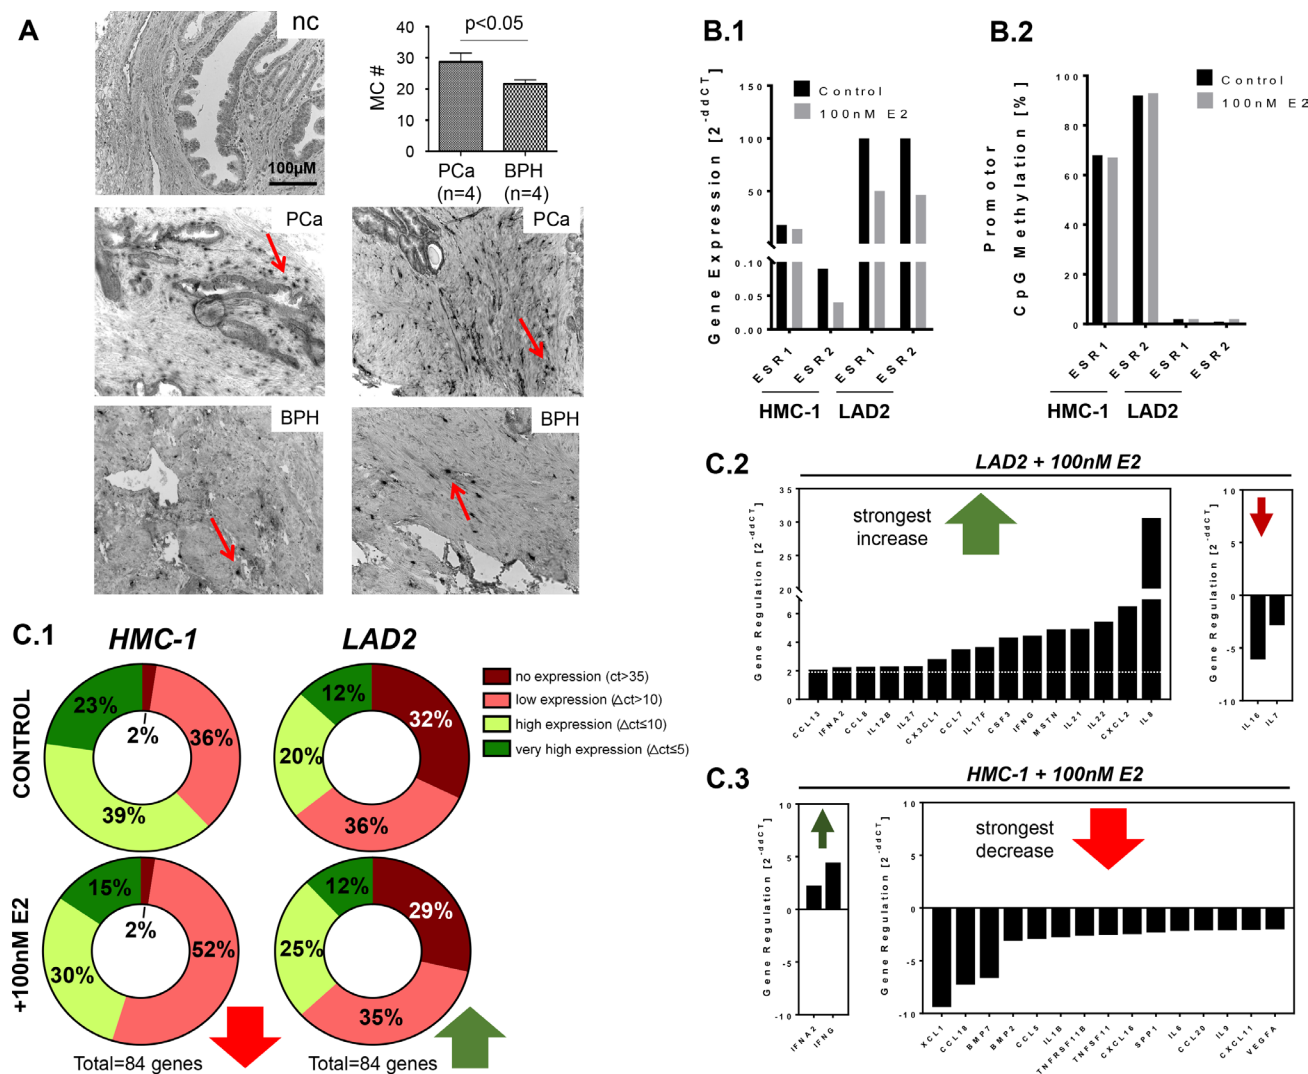

**Figure 4: Incidence of mast cells in the prostate, and different effects of estradiol excess on inflammatory gene expression in mast cells.** (A) Tryptase (mast cell specific protease)-positive foci (marked by arrows) were found to be abundantly present in tumor-associated stroma of prostate carcinoma (PCa) tissues. Benign prostate hyperplasia (BPH) samples exhibited fewer mast cells (MC #) as it is shown in the diagram (A; representative examples for PCa and BPH are shown); (B) Two human mast cell lines, HMC-1 and LAD2, were analyzed with regard to gene expression and CpG-promoter methylation of *ESR1* and *ESR2* before and after short term (24 h) stimulation with 100 nM estradiol (E2). Untreated HMC-1 cells possessed low *ESR1* and *ESR2* expression (B.1) and hypermethylated *ESR1* and *ESR2* promoters (60–90%) (B.2). In contrast, untreated LAD2 cells possessed high *ESR1* and *ESR2* expression (B.1) and unmethylated *ESR1* and *ESR2* promoters (1–2%) (B.2). Expression levels of *ESR1* and *ESR2* after E2-treatment were 2-fold reduced in LAD2, and *ESR2* was 2-fold reduced in HMC-1 (B.1). Short term stimulation with E2 did not change the methylation degrees of *ESR1* and *ESR2* promoters in both cell lines; (C) In order to reveal the effect of estradiol excess on transcription profiles of HMC-1 and LAD2 cells, a transcription profiler for 84 inflammatory genes was utilized. Untreated LAD2 and HMC-1 cells possessed very different expression profiles (C.1, Control). E2 stimulation led to diverging reactions in HMC-1, the majority of responsive genes were down-regulated (increase of the percentage of low expressed genes, in red), whereas LAD2 the majority of responsive genes were up-regulated (increase of the percentage of high expressed genes, in green) (C.1, +100 nM E2). Genes reacting with at least 2-fold gain or loss of expression upon E<sub>2</sub> stimulation (green and red arrows, respectively) are shown for LAD2 and HMC-1 (C.2 and C.3, see also Supplementary Figures 2 and 3).

whereas *ESR2* promoter did not differ from controls with regard to the methylation status. At this point we cannot deliver a conclusive explanation about the deregulation of *ESR1* and *ESR2* gene activity in peripheral blood of CP/CPPS patients, and further differential studies on different types of white blood cells are needed. It is known that *ESR1* (or  $ER\alpha$ ) is expressed in circulating peripheral macrophage- and dendritic cell precursors (MDPs) and plays a critical role in dendritic cell (DC) maturation [29]. In a mouse model it was shown that macrophages, a subtype of DCs, had significantly increased  $TNF\alpha$  and IL-1B levels and that this effect was  $ER\alpha$  dependent [30]. The potential of estrogenic imbalance to skew dendritic cell maturation was shown in postmenopausal women. Plasmacytoid dendritic cells of postmenopausal women showed reduced toll like receptor 7-mediated response, compared to a younger cohort, and this impairment was partially reversed by estradiol supplementation [31]. DCs develop from circulating monocytes and mediate adaptive immunity by antigen-presentation to T-cells, which have been connected to autoimmunity in CP/CPPS. Prostate antigen immunization of wild type mice (C57BL/6) resulted in an IL-4/IL-12 dependent infiltration of CD4+ T-cells and macrophages [13], positing a role for CD4+ T-cells in prostatic inflammation. An earlier case-controlled study also showed that peripheral CD4+ T-cells isolated from peripheral blood buffy-coats of CP/CPPS patients had an increased reactivity to prostatic alkaline phosphatase and PSA [32]. Thus, the systemic deregulation of *ESR1* and *ESR2* genes found in CP/CPPS could indicate a dendritic cell mediated autoimmunity for CP/CPPS. If the observed systemic changes are causative for CP/CPPS or are merely a response to local prostate inflammation remains to be determined.

The prostate has the highest zinc concentration of all organs in the body [33] and semen zinc levels are correlated with fertility parameters including alpha-glycosidase, a function marker of epididymis [34]. Semen zinc is mainly derived from prostatic secretions. The prostate fluid is known to be rich in citric acid, and the solubility of zinc increases with an increasing acidity. Accordingly, in semen of CP/CPPS patients as well as controls we found a significant negative correlation between zinc concentrations and pH-values. In a previous study, zinc levels were also found to be reduced in ejaculates of CP/CPPS patients [35]. However, in our study cohorts we could not detect a difference in semen zinc concentrations between CP/CPPS patients and controls. This may be due to the fact that only data for older (pre-vasectomy) controls were available as reference. Nevertheless, zinc plays an important role for the immune system [36] and dietary zinc also has the potential to alter steroid hormone turnover and modulate testosterone aromatization [37]. Moreover, BPH and PCa tissues also have significantly reduced zinc levels compared to normal prostate tissue [38]. The potential

of zinc deficiency to skew the inflammatory reaction is supported by experiments in pro-myeloid (HL-60) cells, which increased production of IL-1B and  $TNF\alpha$  after zinc depletion [39]. Strikingly, systemic IL-1B and  $TNF\alpha$  were significantly elevated and positively correlated with patient anxiety and depression scores in a large clinical study on CP/CPPS patients [40]. Furthermore, zinc supplementation to CP/CPPS patients led to a significant decrease of their NIH-CPSI score in the follow-up observation after 12 weeks [41].

Mast cells are resident in the human prostate, and have been implicated to play a role in CP/CPPS as well as prostate cancer [16, 42]. Significantly, they are also estrogen responsive [16]. In order to gain mechanistic insight regarding the elevated estrogen levels we observed in the seminal plasma of CP/CPPS patients and the effect on human mast cells, we used two human mast cell lines possessing different expression of the estrogen receptors ( $ER\alpha$  and  $ER\beta$ ) and stimulated them with a high concentration of estradiol (100 nM). These cell lines, HMC-1 and LAD2, are extensively characterized and represent the gold-standard for studies of mast cell function *in vitro*. Similar to leukocytes in the ejaculates of CP/CPPS patients, untreated HMC-1 cells possessed epigenetically (through promoter methylation) caused low *ESR1* and *ESR2* gene expression. In contrast, *ESR1* and *ESR2* were both actively expressed and the promoters were unmethylated in untreated LAD2 cells. The cell lines also differ remarkably in their basal inflammatory gene expression profile and response to estradiol stimulation. In untreated HMC-1 cells 52 out of 84 analyzed inflammatory factors were actively transcribed, whereas in LAD2 cells only 27 out of 84 were expressed. Estradiol stimulation of HMC-1 cells caused a suppression of 21 inflammatory genes (out of 23 responsive genes in total), and in LAD2 cells, an activation of 15 genes (out of 18 responsive). HMC-1 and LAD2 cells also vary considerably in cell properties and culture conditions. LAD2 cells, phenotypically resembling more mature mast cells, grow much slower and are more difficult to culture, compared to HMC-1 cells, which are immature and more progenitor-like. Additionally, a comparison of both cell lines with mature skin mast cells (sMC) also reported that LAD2 cells are intermediately differentiated, while HMC-1 cells are very immature malignantly transformed mast cells [43].

Elevated estrogen levels and altered expression of the estrogen receptors, particularly an altered  $ER\alpha:ER\beta$  ratio, are also factors that are associated with prostate cancer. Previous reports have proposed that *ESR1* and *ESR2* could have a tumor suppressor role in prostate gland. For example, loss of *ESR1* transcription and *ESR1* protein by promoter methylation, respectively, increased with progression of prostatic disease from BPH to low grade and to high grade cancer [44–46]. Most reports on *ESR2* expression concur, that levels decline in localized

prostate cancer with increasing grade from prostatic intraepithelial neoplasia through low to high grade Gleason scores [47–50]. The loss of ESR2 expression in organ confined prostate cancer has been shown to be epigenetically regulated by progressive hypermethylation of *ESR2* promoter [46, 51]. The capability of estrogen as a ligand to down-regulate ER $\alpha$  is well established [52, 53]. In the breast cancer MCF-7 cell line it has also been shown that the phytoestrogens quercetin and genistein share this capability [21], which makes the use of quercetin in treatment of CP/CPPS questionable or, at least emphasizes the need of an individualized therapy with an involvement of molecular analyses prior to treatment. Similar regulation of ER $\beta$  occurs, but can differ between tissue types. A study investigating the effect of estrogen on its receptors found estradiol-mediated ER $\beta$  down-regulation in MCF-7, but up-regulation in human aortic smooth muscle cells [54]. These and our current data support the growing body of evidence implicating chronic prostatitis in the development of prostate malignancy.

In summary, our results demonstrate that estradiol excess in seminal plasma is a characteristic of patients with CP/CPPS. This is also associated with a local epigenetic down-regulation of the estrogen receptors, which is traceable in the somatic cells of the ejaculate. Estrogen was also shown to alter inflammatory cytokine and chemokine expression in mast cells in opposite directions depending on the epigenetic status and transcriptional activity of estrogen receptors, which in turn are implicated in CP/CPPS and prostate cancer development. Overall, these novel findings suggest that estrogen action may play an important role in the chronification of prostatitis. Additionally, these data also suggest that somatic cells from the ejaculate could reflect the inflammation status of the prostate, and may be a viable resource to develop supportive molecular markers for CP/CPPS.

## MATERIALS AND METHODS

### Collection and analysis of liquid biopsies from CP/CPPS patients and healthy controls

Whole blood and semen samples were collected from CP/CPPS patients ( $n = 50$ , median age 39.76, range 23–65) and healthy men (controls) without any preexisting urological conditions ( $n = 61$ , median age 36.77, range 20–69) in the Clinic of Urology, Pediatric Urology and Andrology, JLU Giessen, Germany. The control group comprised volunteers ( $n = 40$ ) and men requesting vasectomy ( $n = 21$ ). The latter cohort was added in order to get an age-matched control cohort and to exclude age-associated effects on hormonal balance. From patients undergoing vasectomy, we used pre-vasectomy peripheral blood and ejaculates, respectively. All study participants gave their written informed consent and the study was

approved by the Ethics Commission of the JLU Giessen (ethical vote, AZ.: 55/13).

The clinical presentation of CP/CPPS patients and healthy volunteers was confirmed according to guidelines [7, 55, 56], including the use of the German version of the Chronic Prostatitis Symptom Index from the National Institute of Health (NIHCPSI) [57] as we previously described [25]. Infection was excluded with microbiological cultures and gene amplification analysis [57, 58]. Since the classification to inflammatory (IIIa) and non-inflammatory (IIIb) CP/CPPS might present two different stages of the same condition [59], both sub-categories were included in our patient cohort.

Blood samples from CP/CPPS patients were routinely analyzed for total testosterone, C-reactive protein (CRP) and prostate specific antigen (PSA) levels in the central laboratory of our university hospital (ADIVA, Siemens Health Care, Erlangen, Germany). Estradiol concentrations in blood and seminal plasma of patients and controls were analyzed separately at the Institute of Laboratory Medicine and Pathobiochemistry, Molecular Diagnostics, UKGM Giessen. Semen parameters of patients and controls were routinely analyzed according to the WHO-2010 recommendations [60]. Seminal plasma was separated from the cellular fraction by centrifugation (5 minutes at 600 g) and analyzed for polymorpho-nuclear elastase, IL-8, alpha-glycosidase and zinc with standardized methods [25]. The cellular fractions (ejaculate pellets) were stored at  $-80^{\circ}$  C and used further for isolation of leukocytes (refer below). CP/CPPS patients and healthy volunteers were examined and evaluated based on CPSI, IPSS and HADS questionnaires. All clinical and pathological data gathered are summarized in Supplementary Figure 1.

### Isolation of leukocytes from whole blood and ejaculate samples

Frozen ( $-80^{\circ}$  C) EDTA blood samples (3 ml) were thawed on ice and incubated for 10 minutes with 5 volumes of red blood cell lysis buffer (15.5 mM  $\text{NH}_4\text{Cl}$ , 1 mM  $\text{KHCO}_3$  and 0.01 mM tetra-sodium EDTA in diethyl-pyrocabonate treated deionized water; pH 7.3). Cells were centrifuged (10 minutes at 600 g) and pellets were incubated with 1.5 ml fresh buffer on ice for another 10 minutes. Blood leukocytes were obtained by centrifugation (5 minutes at 600 g). Ejaculate leukocytes were isolated from frozen-stored ejaculate pellets by density gradient centrifugation. Briefly, ejaculate pellets were thawed on ice and dissolved in 600  $\mu\text{l}$  DMEM-F12 medium (Gibco). Samples were then placed on top of a pre-layered Histopaque<sup>®</sup>1077 gradient (1.5 ml 90% + 1.5 ml 50% + 1.5 ml 20%; all solutions at  $4^{\circ}$  C) in 12ml-polypropylene-tubes (Sarstedt) and centrifuged (30 minutes at 400 g). The phenol-red from DMEM-F12

allowed for convenient identification of resulting phases. Upper fraction contained leukocytes, and the pellet contained sperm cells. Leukocytes were pelleted by centrifugation for 5 minutes at 600 g and 4° C. Leukocytes from blood and ejaculates were washed twice with PBS and frozen at -80° C until DNA and RNA isolations.

### DNA and RNA extractions from leukocytes

Blood and ejaculate leukocyte samples were thawed on ice and dissolved in 1ml peqGOLD TriFast™ reagent (Peqlab). The aqueous phase was used for RNA isolation and DNA was isolated from the organic phase. RNA and DNA isolations were performed according to the manufacturer's protocol (Peqlab). RNA was digested with 1 unit DNaseI in 20 µl volume following the manufacturer's (NEB) instructions, purified and dissolved in 20 µl of DEPC treated nuclease-free water. DNA was recovered from the same sample by addition of 0.5 ml Back Extraction Buffer (4 M guanidine thiocyanate, 50 mM sodium citrate and 1 M Tris) to the organic phase. RNA and DNA concentrations were measured on NanoDrop 1000 (Thermo Scientific) and stored at -80° C until use.

### 5-aza-2'-deoxycytidine treatment of prostate cancer cell lines and COBRA analysis

Human prostate cancer cell lines PC3, LNCaP and DU145 were used in order to analyze the effect of *ESR1* and *ESR2* promoter methylation and demethylation, respectively, on gene expression. As described in our previous study [25], 30% confluent cell plates were treated with 5 µM 5-aza-2'-deoxycytidine (Sigma Aldrich) for 72 hours. On day 4, the cells were harvested and the nucleic acids were isolated and subjected for *ESR1* and *ESR2* expression analyses (by RT-qPCR as described below) and promoter methylation analyses by COBRA (combined bisulfite restriction analysis; Table 1) using the CGCG-specific enzyme *Bsh1236i* (Thermo Fisher Scientific).

### Estrogen stimulation of HMC-1 and LAD2 cells, and RNA and DNA isolations

Human HMC-1 mast cells (kindly provided by Dr J. Butterfield; Mayo Clinic, USA) were cultured as previously described [16]. LAD2 cells (kindly provided by Dr A. Kirshenbaum; National Institutes of Health, USA) were maintained as previously described [61]. Cells were then seeded into 10cm dishes at densities of  $\sim 0.176 \times 10^6/\text{cm}^2$  (HMC1,  $1 \times 10^7/\text{dish}$ ) and  $\sim 0.529 \times 10^5/\text{cm}^2$  (LAD2,  $3 \times 10^6/\text{dish}$ ). Treatments (100 nM estradiol or ethanol vehicle control) were done twice (for DNA and RNA, respectively) under the same conditions. After 24 hours, cells were washed with PBS (5 minutes centrifugation at 400 g) and resuspended in 50 µL PBS for DNA isolation or 100 µl RNA-later (Sigma) for RNA isolation. For

DNA extraction, cell pellets were digested for 1 hour with 0.75 µg/µL proteinase K (Carl Roth) at 56° C. 500 µL of Phenol/Chloroform/isoamylalcohol (25:24:1) were added, and phase separation was acquired by centrifugation (10 minutes at 13.000 rpm). DNA samples were precipitated with 1 volume isopropanol, 1/10 volume sodium acetate (3 M) and 5 µg glycogen. RNA from cell pellets was isolated with peqGOLD TriFast™ reagent (Peqlab) according to manufacturer's protocol. RNA and DNA concentrations were measured on the NanoDrop-1000 (Thermo Scientific) and stored at -80° C until use.

### Gene expression analyses using RT-qPCR and RT<sup>2</sup> Profiler

Leukocytes isolated from blood and ejaculates of CP/CPPS patients and healthy controls were analyzed for relative gene expression of *ESR1*, *ESR2*, *AR*, *CMA1*, *ARO* and *PUI1* by RT-qPCR (reverse transcription followed by quantitative real-time PCR) using the CFX96 Touch™ RealTime PCR Detection System (Biorad) and RotorGene SYBR Green PCR Kit (Qiagen) (Table 1). The house keeping gene *TUBA1B* (alpha-tubulin) was used as reference gene (Table 1). An RNA sample isolated from blood leukocytes of a healthy donor was used as internal standard sample (calibrator). RNA samples (each 2 µg) were reverse transcribed in cDNA with MMLV-RT (Promega) according to manufacturer's protocol. The cDNA samples were purified with the Nucleotide Removal Kit (Qiagen). Quantitative PCRs were performed in duplicates. Relative expression levels were calculated with the  $\Delta\Delta C_T$  method.

Untreated and  $E_2$ -stimulated mast cell lines HMC-1 and LAD2 were analyzed with regard to relative gene expression of 84 inflammatory factors using the RT<sup>2</sup> Profiler™ "Human Cytokines and Chemokines PCR Array" (Qiagen) ( $E_2$ -responsive genes are shown in Supplementary Figure 2). Briefly, RNA samples (each 2 µg) were reverse-transcribed with the RT<sup>2</sup> First Strand Kit (Qiagen). The cDNA samples were purified with the Nucleotide Removal Kit (Qiagen) and applied for the RT<sup>2</sup> Profiler™. Relative gene expression levels were calculated according to manufacturer's suggestion by using the SA Biosciences PCR Array Data Analysis Web portal (Qiagen). Five housekeeping genes (*ACTB*, *B2M*, *GAPDH*, *HPRT1* and *RPLP0*) were included. The genes *B2M*, *GAPDH* and *HPRT1* showing the most stable results, were chosen as reference genes for normalization of values generated by RT<sup>2</sup> Profiler™. RT-qPCRs for *ESR1*, *ESR2*, *AR* and *TUBA1* were done for HMC-1 and LAD2 RNA samples in triplicates as described before.

### CpG-promotor methylation analyses by pyrosequencing and EpiTect Methyl II Profiler

Leukocytes isolated from blood and ejaculates of CP/CPPS patients and healthy controls, and mast cell

**Table 1: Primer sets used for pyrosequencing, COBRA and RT-qPCR**

| Method/Gene                 | Upper (5'-3')                                     | Lower (5'-3')                | Ta | PCR size |
|-----------------------------|---------------------------------------------------|------------------------------|----|----------|
| Pyrosequencing/ <i>ESR1</i> | Hs_ESR1_01_PM PyroMark CpG assay (Qiagen, 4 CpGs) |                              | 60 | 114bp    |
| Pyrosequencing/ <i>ESR2</i> | Hs_ESR2_01_PM PyroMark CpG assay (Qiagen, 8 CpGs) |                              | 60 | 192bp    |
| Pyrosequencing/ <i>AR</i>   | Hs_AR_01_PM PyroMark CpG assay (Qiagen, 5 CpGs)   |                              | 60 | 167bp    |
| COBRA/ <i>ESR1</i>          | AGYGTGTTTTYAGGT<br>TYGTT                          | ACTCCCRCAACTCCCTAAAC         | 60 | 247bp    |
| COBRA/ <i>ESR2</i>          | TGTGGGTGGATTAGG<br>AGTYG                          | RCCTACTCTTCRCCCTACAA         | 60 | 299bp    |
| RT-qPCR/ <i>ESR1</i>        | TGCAGGGGAGAGGAGTTTGTG                             | GGACAGAAATGTGTACA<br>CTCCAGA | 60 | 71bp     |
| RT-qPCR/ <i>ESR2</i>        | GATGAGGGGAAATGCGTAGA                              | GATCATGGCCTTGACACAGA         | 60 | 120bp    |
| RT-qPCR/ <i>AR</i>          | GCAGGAAGCAGTATCCGAAG                              | GACACCGACACTGCCTTACA         | 60 | 144bp    |
| RT-qPCR/ <i>CMA1</i>        | GTCCACCTGGGAGAATGTG                               | TCTTGCAGAGTGTCTGAGCC         | 60 | 80bp     |
| RT-qPCR/ <i>ARO</i>         | AGGAGGTGACCAATGAATCG                              | CACGATAGCACTTTCGTCCA         | 60 | 116bp    |
| RT-qPCR/ <i>PU.1</i>        | GTGCCCTATGACACGGATCT                              | CCAGTAATGGTCGCTATGGCT        | 60 | 93bp     |
| RT-qPCR/ <i>TUBA1B</i>      | CGTGCCCCGGGCTGTGTTT                               | GCAGCATCTTCCTTGCCTGTGA       | 60 | 117bp    |

**Abbreviations:** COBRA: combined bisulfite restriction analysis (Y = C + T; R = A + G); RT-qPCR: reverse transcription followed by quantitative real-time PCR; Ta: annealing temperature; PCR size: length of PCR product; *ESR1*: Estrogen Receptor Alpha; *ESR2*: Estrogen Receptor Beta; *AR*: Androgen Receptor; *CMA1*: Human mast cell chymase 1; *ARO*: Aromatase; *PU.1*: hematopoietic transcription factor SPI1 binding to PU-box; *TUBA1B*: tubulin alpha 1b.

lines HMC-1 and LAD2 (untreated and E2-stimulated) were analyzed for CpG-promoter methylation of *ESR1*, *ESR2* and *AR* genes. Therefore, 1 µg DNA was bisulfite-treated using the EZ DNA Methylation™ Kit (Zymogen). Bisulfite-treated DNA samples were subsequently amplified and pyrosequenced using appropriate primer sets (Table 1, Qiagen) and the PyroMark Q24 System (Qiagen). Prior pyrosequencing the PCR products were controlled on an agarose gel (2%). Methylation values were analyzed using PyroMark Q24 Software (Qiagen; quantitative analysis of 4 CpG sites in *ESR1*, 8 CpGs in *ESR2* and 5 CpGs in *AR*).

Both mast cell lines were analyzed for CpG-promoter methylation of 22 inflammatory factors using the EpiTect Methyl II “Human Cytokine Production Signature Panel” (Qiagen) (Supplementary Figure 3). Briefly, according to the manufacturer’s protocol, DNA samples from control and E2-stimulated HMA-1 and LAD2 cells were first incubated with methylation-dependent restriction enzymes. A subsequent qPCR on prefabricated 96-well plates and application of the appropriate software (Qiagen) enabled the quantification of individual CpG methylation levels. The qPCRs were done using the RotorGene SYBR Green PCR Kit (Qiagen) and the CFX96 Touch™ RealTime PCR Detection System (Biorad). Additionally, HMC-1 and LAD2 cells were analyzed using pyrosequencing for CpG-promoter methylation of *CXCL12*, *CXCR4* and *IL-13* genes using appropriate primer sets (Qiagen) (Table 1, Supplementary Figure 3).

### Detection of mast cell tryptase in PCa and BPH tissue samples

Tissue samples from prostate carcinoma (PCa, obtained by radical prostatectomy) and benign prostate hyperplasia (BPH, obtained by transurethral resection of prostate) were collected at the Clinic of Urology, Pediatric Urology and Andrology, JLU Giessen, Germany. Patients gave their written informed consent for participation in a research study. The study was approved by the ethical committee of the Medical Faculty, JLU Giessen (ethical vote, AZ.: 123/12). Prostate tissue samples were characterized at the Institute of Pathology, JLU Giessen. Immunohistochemistry was performed on paraffin-embedded tissue sections. Briefly, after deparaffinization with Xylool, the tissue slides were washed with ethanol and cooked in antigen retrieval buffer (10% citrate, pH = 6.0). After permeabilization, slides were incubated at 4° C overnight with monoclonal anti- $\alpha$ -Tryptase (1:1000, Santa Cruz, sc-59587) in 2% PBT (PBS containing 2% Triton X-100). Then, slides were washed thrice with 2% PBT and incubated for 1 hour with biotinylated polyclonal goat  $\alpha$ -rabbit IgG (1:200, Dako Denmark A/S, E0432). Development was done with VECTASTAIN Elite ABC-Peroxidase (Vector Laboratories) using 3,3'-diaminobenzidine (DAB) enhanced liquid substrate systems (Sigma-Aldrich). Tryptase positive mast cells were counted in PCa ( $n = 4$ ) and BPH samples ( $n = 4$ ) in tissue areas of the same size and mean values were compared using  $t$ -test.

## Statistical analysis

Statistical analyses were done with SPSS 23.0 (IBM) and Prism 7.02 (Graphpad). Median values are given for age, basic semen parameters, IPSS, CPSI scores and biochemical parameters. Median values and ranges (minimum-maximum) for mRNA and promoter CpG-methylation levels are given in Boxplots and shown in figures. Non-parametric variables were compared using the Mann–Whitney *U*-test (2-sided). Only *p*-values  $\leq 0.02$  were considered as statistically significant.

## Abbreviations

CP/CPPS: chronic prostatitis chronic pelvic pain syndrome; ESR1: estrogen receptor alpha; ESR2: estrogen receptor beta; E<sub>2</sub>: estradiol; AR: androgen receptor; PCa: prostate carcinoma; BPH: benign prostate hyperplasia; CPSI: chronic prostatitis symptom index; IPSS: international prostate symptom score.

## Author contributions

US and FW conceptualized and designed the study; FW and AP were responsible for daily clinical routine and the flow of biological materials; US and TD supervised the experimental part; NN, CH, EB and RS collected and processed liquid biopsies from patients and healthy donors, and acquired clinical data; NN performed epigenetic studies on liquid biopsies and mast cell lines and statistical data evaluation; SE and GR provided estradiol treated mast cell lines; HCS was responsible for routine investigation of semen parameters; WW supported substantially the infrastructure and scientific network; NN, TD, FW and US evaluated and interpreted the data; NN and US wrote the manuscript; all authors revised and approved the manuscript.

## ACKNOWLEDGMENTS

We thank Mrs. Tania Bloch, Mrs. Kerstin Wilhelm and Mrs. Brindusa Schuster for technical assistance in semen analysis; Mrs. Julia Wolf for support in patient data management; Mrs. Barbara Froehlich for technical assistance in RT-qPCR; Mr. Siva Reddy Velagala for IHC analyses in PCa and BPH tissue samples; Mrs. Birunthi Niranjani and Mrs. Linda Teng for support in E<sub>2</sub>-treatment of mast cell lines; Mrs. Lisa M Teuchert for support in collection of patient material.

## CONFLICTS OF INTEREST

The authors declare no competing financial interests.

## FUNDING

This study was supported by the German Research Foundation (DFG), in the frame of the IRTG1871 “Molecular pathogenesis of male reproductive disorders” (grant to FW, US, WW, SE and GR, project 5).

## REFERENCES

1. Lepor H. Pathophysiology of benign prostatic hyperplasia in the aging male population. *Rev Urol.* 2005; 7:S3–S11.
2. NIH. National Cancer Institute - Cancer Stat Facts. Prostate Cancer. 2017.
3. Collins MM, Meigs JB, Barry MJ, Walker Corkery E, Giovannucci E, Kawachi I. Prevalence and correlates of prostatitis in the health professionals follow-up study cohort. *J Urol.* 2002; 167:1363–1366.
4. Wagenlehner F, Pilatz A, Linn T, Diemer T, Schuppe HC, Schagdarsurengin U, Hossain H, Meinhardt A, Ellem S, Risbridger G, Weidner W. Prostatitis and andrological implications. *Minerva Urol Nefrol.* 2013; 65:117–123.
5. Krieger JN, Nyberg L Jr, Nickel JC. NIH consensus definition and classification of prostatitis. *JAMA.* 1999; 282:236–37.
6. Magistro G, Wagenlehner F, Grabe M, Weidner W, Stief C, Nickel JC. Contemporary management of chronic prostatitis/ chronic pelvic pain syndrome. *Eur Urol.* 2016; 69:286–297.
7. Schaeffer AJ, Knauss JS, Landis JR, Probert KJ, Alexander RB, Litwin MS, Nickel JC, O’Leary MP, Nadler RB, Pontari MA, Shoskes DA, Zeitlin SI, Fowler JE Jr, et al, and Chronic Prostatitis Collaborative Research Network Study Group. Leukocyte and bacterial counts do not correlate with severity of symptoms in men with chronic prostatitis: The National Institutes of Health Chronic Prostatitis Cohort Study. *J Urol.* 2002; 168:1048–1053.
8. Shoskes D, Nickel JC, Dolinga R, Prots D. Clinical phenotyping of patients with chronic prostatitis/ chronic pelvic pain syndrome and correlation with symptom severity. *Urology.* 2009; 73:538–542.
9. Magri V, Wagenlehner F, Perletti G, Schneider S, Marras E, Naber KG, Weidner W. Use of the UPOINT chronic prostatitis/chronic pelvic pain syndrome classification in European patient cohorts: sexual function domain improves correlations. *J Urol.* 2010; 184:2339–2345.
10. Bonkhoff H, Berges R. The evolving role of oestrogens and their receptors in the development and progression of prostate cancer. *Eur Urol.* 2009; 55:533–42.
11. Dimitrakov J, Joffe HV, Soldin SJ, Bolus R, Buffington CA, Nickel JC. Adrenocortical hormone abnormalities in men with chronic prostatitis/chronic pelvic pain syndrome. *Urology.* 2008; 71:261–266.

12. Byun JS, Yoon TK, Rhee HW, Kim JH, Shin JS, Kim HS, Bak CW. Chronic pelvic pain syndrome and semen quality of Korean men in their fourth decade. *J Androl.* 2012; 33:876–885.
13. Motrich RD, Bresler ML, Sanchez LR, Godoy GJ, Prinz I, Rivero VE. IL-17 is not essential for inflammation and chronic pelvic pain development in an experimental model of chronic prostatitis/chronic pelvic pain syndrome. *Pain.* 2016; 157:585–597.
14. Bernoulli J, Yatkin E, Laakso A, Anttinen M, Bosland M, Vega K, Kallajoki M, Santti R, Pylkkänen L. Histopathological evidence for an association of inflammation with ductal pin-like lesions but not with ductal adenocarcinoma in the prostate of the noble rat. *Prostate.* 2008; 68:728–739.
15. Ellem SJ, Wang H, Poutanen M, Risbridger GP. Increased endogenous estrogen synthesis leads to the sequential induction of prostatic inflammation (prostatitis) and prostatic pre-malignancy. *Am J Pathol.* 2009; 175:1187–1199.
16. Ellem SJ, Taylor RA, Furic L, Larsson O, Frydenberg M, Pook D, Pedersen J, Cawsey B, Trotta A, Need E, Buchanan G, Risbridger GP. A pro-tumourigenic loop at the human prostate tumour interface orchestrated by oestrogen, CXCL12 and mast cell recruitment. *J Pathol.* 2014; 234:86–98.
17. Done JD, Rudick CN, Quick ML, Schaeffer AJ, Thumbikat P. Role of mast cells in male chronic pelvic pain. *J Urol.* 2012; 187:1473–1482.
18. De Rose AF, Gallo F, Giglio M, Carmignani G. Role of mepartricin in category III chronic nonbacterial prostatitis/chronic pelvic pain syndrome: a randomized prospective placebo-controlled trial. *Urology.* 2004; 63:13–16.
19. Miodini P, Fioravanti L, Di Fronzo G, Cappelletti V. The two phyto-oestrogens genistein and quercetin exert different effects on oestrogen receptor function. *Br J Cancer.* 1999; 80:1150–1155.
20. Shoskes DA, Zeitlin SI, Shahed A, Rajfer J. Quercetin in men with category III chronic prostatitis: a preliminary prospective, double-blind, placebo-controlled trial. *Urology.* 1999; 54:960–963.
21. Maggiolini M, Bonofiglio D, Marsico S, Panno ML, Cenni B, Picard D, Ando S. Estrogen receptor alpha mediates the proliferative but not the cytotoxic dose-dependent effects of two major phytoestrogens on human breast cancer cells. *Mol Pharmacol.* 2001; 60:595–602.
22. Saijo K, Collier JG, Li AC, Katzenellenbogen JA, Glass CK. An ADIOL-ERbeta-CtBP transrepression pathway negatively regulates microglia-mediated inflammation. *Cell.* 2011; 145:584–595.
23. Jacenik D, Cygankiewicz AI, Fichna J, Mokrowiecka A, Malecka-Panas E, Krajewska WM. Estrogen signaling deregulation related with local immune response modulation in irritable bowel syndrome. *Mol Cell Endocrinol.* 2017S0303-7207(17)30416-1.
24. Zhang ZY, Schluesener HJ. HDAC inhibitor MS-275 attenuates the inflammatory reaction in rat experimental autoimmune prostatitis. *Prostate.* 2012; 72:90–99. <https://doi.org/10.1002/pros.21410>.
25. Schagdarsurengin U, Teuchert LM, Hagenkotter C, Nesheim N, Dansranjav T, Schuppe HC, Gies S, Pilatz A, Weidner W, Wagenlehner FM. Chronic Prostatitis Affects Male Reproductive Health and Is Associated with Systemic and Local Epigenetic Inactivation of C-X-C Motif Chemokine 12 Receptor C-X-C Chemokine Receptor Type 4. *Urol Int.* 2017; 98:89–101.
26. He A, Shi GP. Mast cell chymase and tryptase as targets for cardiovascular and metabolic diseases. *Curr Pharm Des.* 2013; 19:1114–1125.
27. Wagenlehner FM, van Till JW, Magri V, Perletti G, Houbiers JG, Weidner W, Nickel JC. National Institutes of Health Chronic Prostatitis Symptom Index (NIH-CPSI) symptom evaluation in multinational cohorts of patients with chronic prostatitis/chronic pelvic pain syndrome. *Eur Urol.* 2013; 63:953–9.
28. Beutel ME, Wiltink J, Hauck EW, Auch D, Behre HM, Brähler E, Weidner W, and Hypogonadism Investigator Group. Correlations between hormones, physical, and affective parameters in aging urologic outpatients. *Eur Urol.* 2005; 47:749–55.
29. Laffont S, Seillet C, Guery JC. Estrogen Receptor-Dependent Regulation of Dendritic Cell Development and Function. *Front Immunol.* 2017; 8:108.
30. Calippe B, Douin-Echinard V, Delpy L, Laffargue M, Lelu K, Krust A, Pipy B, Bayard F, Arnal JF, Guery JC, Gourdy P. 17Beta-estradiol promotes TLR4-triggered proinflammatory mediator production through direct estrogen receptor alpha signaling in macrophages *in vivo*. *J Immunol.* 2010; 185:1169–1176.
31. Seillet C, Laffont S, Tremollieres F, Rouquie N, Ribot C, Arnal JF, Douin-Echinard V, Gourdy P, Guery JC. The TLR-mediated response of plasmacytoid dendritic cells is positively regulated by estradiol *in vivo* through cell-intrinsic estrogen receptor alpha signaling. *Blood.* 2012; 119:454–464.
32. Kouivaskaia DV, Southwood S, Berard CA, Klyushnenkova EN, Alexander RB. T-cell recognition of prostatic peptides in men with chronic prostatitis/chronic pelvic pain syndrome. *J Urol.* 2009; 182:2483–2489.
33. Zaichick V, Sviridova TV, Zaichick SV. Zinc in the human prostate gland: normal, hyperplastic and cancerous. *Int Urol Nephrol.* 1997; 29:565–74.
34. Mankad M, Sathawara NG, Doshi H, Saiyed HN, Kumar S. Seminal plasma zinc concentration and alpha-glucosidase

- activity with respect to semen quality. *Biol Trace Elem Res*. 2006; 110:97–106.
35. Condorelli RA, Russo GI, Calogero AE, Morgia G, La Vignera S. Chronic prostatitis and its detrimental impact on sperm parameters: a systematic review and meta-analysis. *J Endocrinol Invest*. 2017; 40:1209–18. <https://doi.org/10.1007/s40618-017-0684-0>.
  36. Gammoh NZ, Rink L. Zinc in Infection and Inflammation. *Nutrients*. 2017; 9.
  37. Om AS, Chung KW. Dietary zinc deficiency alters 5 alpha-reduction and aromatization of testosterone and androgen and estrogen receptors in rat liver. *J Nutr*. 1996; 126:842–848.
  38. Christudoss P, Selvakumar R, Fleming JJ, Gopalakrishnan G. Zinc status of patients with benign prostatic hyperplasia and prostate carcinoma. *Indian J Urol*. 2011; 27:14–18.
  39. Wessels I, Haase H, Engelhardt G, Rink L, Uciechowski P. Zinc deficiency induces production of the proinflammatory cytokines IL-1beta and TNFalpha in promyeloid cells via epigenetic and redox-dependent mechanisms. *J Nutr Biochem*. 2013; 24:289–297.
  40. Hu C, Yang H, Zhao Y, Chen X, Dong Y, Li L, Dong Y, Cui J, Zhu T, Zheng P, Lin CS, Dai J. The role of inflammatory cytokines and ERK1/2 signaling in chronic prostatitis/chronic pelvic pain syndrome with related mental health disorders. *Sci Rep*. 2016; 6:28608.
  41. Goodarzi D, Cyrus A, Baghinia MR, Kazemifar AM, Shirincar M. The efficacy of zinc for treatment of chronic prostatitis. *Acta Med Indones*. 2013; 45:259–264.
  42. Roman K, Done JD, Schaeffer AJ, Murphy SF, Thumbikat P. Tryptase-PAR2 axis in experimental autoimmune prostatitis, a model for chronic pelvic pain syndrome. *Pain*. 2014; 155:1328–1338.
  43. Guhl S, Babina M, Neou A, Zuberbier T, Artuc M. Mast cell lines HMC-1 and LAD2 in comparison with mature human skin mast cells--drastically reduced levels of tryptase and chymase in mast cell lines. *Exp Dermatol*. 2010; 19:845–847.
  44. Li LC, Chui R, Nakajima K, Oh BR, Au HC, Dahiya R. Frequent methylation of estrogen receptor in prostate cancer: correlation with tumor progression. *Cancer Res*. 2000; 60:702–706.
  45. Lau KM, LaSpina M, Long J, Ho SM. Expression of estrogen receptor (ER)-alpha and ER-beta in normal and malignant prostatic epithelial cells: regulation by methylation and involvement in growth regulation. *Cancer Res*. 2000; 60:3175–3182.
  46. Daniels G, Gellert LL, Melamed J, Hatcher D, Li Y, Wei J, Wang J, Lee P. Decreased expression of stromal estrogen receptor  $\alpha$  and  $\beta$  in prostate cancer. *Am J Transl Res*. 2014; 6:140–146.
  47. Leav I, Lau KM, Adams JY, McNeal JE, Taplin ME, Wang J, Singh H, Ho SM. Comparative studies of the estrogen receptors beta and alpha and the androgen receptor in normal human prostate glands, dysplasia, and in primary and metastatic carcinoma. *Am J Pathol*. 2001; 159:79–92.
  48. Fujimura T, Takahashi S, Urano T, Ogawa S, Ouchi Y, Kitamura T, Muramatsu M, Inoue S. Differential expression of estrogen receptor beta (ERbeta) and its C-terminal truncated splice variant ERbetacx as prognostic predictors in human prostatic cancer. *Biochem Biophys Res Commun*. 2001; 289:692–699.
  49. Pasquali D, Rossi V, Esposito D, Abbondanza C, Puca GA, Bellastella A, Sinisi AA. Loss of estrogen receptor beta expression in malignant human prostate cells in primary cultures and in prostate cancer tissues. *J Clin Endocrinol Metab*. 2001; 86:2051–2055.
  50. Horvath LG, Henshall SM, Lee CS, Head DR, Quinn DI, Makela S, Delprado W, Golovsky D, Brenner PC, O'Neill G, Kooner R, Stricker PD, Grygiel JJ, et al. Frequent loss of estrogen receptor-beta expression in prostate cancer. *Cancer Res*. 2001; 61:5331–5335.
  51. Zhu X, Leav I, Leung YK, Wu M, Liu Q, Gao Y, McNeal JE, Ho SM. Dynamic regulation of estrogen receptor-beta expression by DNA methylation during prostate cancer development and metastasis. *Am J Pathol*. 2004; 164:2003–2012.
  52. Santagati S, Gianazza E, Agrati P, Vegeto E, Patrone C, Pollio G, Maggi A. Oligonucleotide squelching reveals the mechanism of estrogen receptor autologous down-regulation. *Mol Endocrinol*. 1997; 11:938–949.
  53. Ellison-Zelski SJ, Solodin NM, Alarid ET. Repression of ESR1 through actions of estrogen receptor alpha and Sin3A at the proximal promoter. *Mol Cell Biol*. 2009; 29:4949–4958.
  54. Barchiesi F, Jackson EK, Imthurn B, Fingerle J, Gillespie DG, Dubey RK. Differential regulation of estrogen receptor subtypes alpha and beta in human aortic smooth muscle cells by oligonucleotides and estradiol. *J Clin Endocrinol Metab*. 2004; 89:2373–81.
  55. Nickel JC, Nyberg LM, Hennenfent M. Research guidelines for chronic prostatitis: consensus report from the first National Institutes of Health International Prostatitis Collaborative Network. *Urology*. 1999; 54:229–233.
  56. Lotti F, Corona G, Mondaini N, Maseroli E, Rossi M, Filimberti E, Noci I, Forti G, Maggi M. Seminal, clinical and colour-Doppler ultrasound correlations of prostatitis-like symptoms in males of infertile couples. *Andrology*. 2014; 2:30–41.
  57. Hochreiter W, Ludwig M, Weidner W, Wagenlehner F, Naber K, Eremenco S, Arnold B. National Institutes of Health (NIH) Chronic Prostatitis Symptom Index. The German version. [Article in German] *Urologe A*. 2001; 40:16–7.
  58. Pilatz A, Hossain H, Kaiser R, Mankertz A, Schüttler CG, Domann E, Schuppe HC, Chakraborty T, Weidner W, Wagenlehner F. Acute epididymitis revisited: impact



- of molecular diagnostics on etiology and contemporary guideline recommendations. *Eur Urol.* 2015; 68:428–435.
59. Xiao J, Ren L, Lv H, Ding Q, Lou S, Zhang W, Dong Z. Atypical microorganisms in expressed prostatic secretion from patients with chronic prostatitis/chronic pelvic pain syndrome: microbiological results from a case-control study. *Urol Int.* 2013; 91:410–416.
60. WHO. WHO Laboratory Manual for the Examination and Processing of Human Semen. Geneva. 2010.
61. Kirshenbaum AS, Akin C, Wu Y, Rottem M, Goff JP, Beaven MA, Rao VK, Metcalfe DD. Characterization of novel stem cell factor responsive human mast cell lines LAD 1 and 2 established from a patient with mast cell sarcoma/leukemia; activation following aggregation of FcepsilonRI or FcgammaRI. *Leuk Res.* 2003; 27:677–682.
