# Supplementary material for: Elevated seminal plasma estradiol and epigenetic inactivation of ESR1 and ESR2 is associated with CP/CPPS
Source: PubMed Central journal article supplement (PMC5929413; doi:10.18632/oncotarget.24714), 2018-04-13
Supplement: oncotarget-09-19623-s001.pdf [file oncotarget-09-19623-s001.pdf]

# Elevated seminal plasma estradiol and epigenetic inactivation of *ESR1* and *ESR2* is associated with CP/CPPS

## SUPPLEMENTARY MATERIALS

|                        |                                    | Raw Values   |         |        |                   |         |        |              |         |        |                   |         |        | Significance Values |                              |                |                         |                         |                         |
|------------------------|------------------------------------|--------------|---------|--------|-------------------|---------|--------|--------------|---------|--------|-------------------|---------|--------|---------------------|------------------------------|----------------|-------------------------|-------------------------|-------------------------|
|                        |                                    | HV <40 years |         |        | CP/CPPS <40 years |         |        | HV 40+ years |         |        | CP/CPPS 40+ years |         |        | HV vs. CP/CPPS      | HV vs. CP/CPPS (age-matched) | HV vs. CP/CPPS | HV vs. HV               | CP/CPPS vs. CP/CPPS     | HV vs. CP/CPPS          |
|                        |                                    | n            | Median  | STD    | n                 | Median  | STD    | n            | Median  | STD    | n                 | Median  | STD    | <40 years           | <40 years                    | 40+ years      | <40 years vs. 40+ years | <40 years vs. 40+ years | <40 years vs. 40+ years |
| Routine Semen Analysis | Age (Years)                        | 30           | 25.55   | 5.29   | 26                | 31.41   | 5.43   | 31           | 48.00   | 8.03   | 24                | 48.10   | 6.28   | 0.007               | 0.936                        | 0.270          | <0.001                  | <0.001                  | 0.272                   |
|                        | Volume (mL)                        | 30           | 3.00    | 1.63   | 26                | 2.40    | 1.62   | 19           | 3.00    | 1.29   | 24                | 1.75    | 1.41   | 0.027               | 0.178                        | 0.001          | 0.797                   | 0.321                   | <0.001                  |
|                        | pH                                 | 30           | 8.10    | 0.31   | 26                | 7.60    | 0.29   | 19           | 7.40    | 0.21   | 24                | 7.50    | 0.38   | <0.001              | <0.001                       | 0.673          | <0.001                  | 0.264                   | 0.002                   |
|                        | Spermatozoa/mL                     | 30           | 62.40   | 65.60  | 26                | 31.70   | 37.12  | 19           | 62.40   | 44.53  | 24                | 27.30   | 80.87  | 0.015               | 0.013                        | 0.074          | 0.829                   | 0.869                   | 0.002                   |
|                        | Spermatozoa/Total                  | 30           | 175.75  | 170.84 | 26                | 67.30   | 162.47 | 19           | 165.00  | 192.64 | 24                | 45.73   | 154.31 | <0.001              | 0.002                        | 0.001          | 0.790                   | 0.749                   | <0.001                  |
|                        | Motility Grade A (Progressive)     | 30           | 47.50   | 19.30  | 26                | 21.50   | 15.05  | 19           | 5.00    | 12.77  | 21                | 13.00   | 9.83   | <0.001              | 0.011                        | 0.503          | <0.001                  | 0.174                   | 0.004                   |
|                        | Motility Grade B (Non-linear)      | 30           | 17.00   | 8.42   | 26                | 24.00   | 9.40   | 19           | 29.00   | 11.65  | 21                | 25.00   | 9.07   | 0.003               | 0.069                        | 0.153          | <0.001                  | 0.889                   | 0.129                   |
|                        | Motility Grade C (Non-Progressive) | 30           | 7.50    | 5.65   | 26                | 8.00    | 4.33   | 19           | 11.00   | 6.17   | 21                | 11.00   | 9.39   | 0.433               | 0.872                        | 0.872          | 0.091                   | 0.197                   | 0.412                   |
|                        | Motility Grade D (Immotile)        | 30           | 27.50   | 14.34  | 26                | 37.00   | 16.55  | 19           | 43.00   | 15.21  | 21                | 44.00   | 14.05  | 0.005               | 0.069                        | 0.282          | 0.001                   | 0.023                   | 0.003                   |
|                        | Vitality (Eosin Test)              | 30           | 82.00   | 7.54   | 8                 | 68.00   | 17.07  | 17           | 73.00   | 13.19  | 9                 | 68.00   | 20.17  | 0.013               | 0.121                        | 0.164          | 0.006                   | 0.742                   | 0.001                   |
|                        | Peroxidase+ Cells (Mio/mL)         | 29           | 0.00    | 0.21   | 25                | 0.10    | 0.23   | 19           | 0.10    | 0.16   | 24                | 0.20    | 0.26   | 0.217               | 0.320                        | 0.133          | 0.337                   | 0.213                   | 0.045                   |
|                        | MAR Test IgG                       | 2            | 7.00    | 9.90   | 20                | 1.00    | 8.80   | 9            | 0.00    | 2.96   | 16                | 0.00    | 5.21   | 0.779               | 0.837                        | 0.760          | 0.582                   | 0.863                   | 0.814                   |
|                        | MAR Test IgA                       | 2            | 0.00    | 0.00   | 20                | 1.50    | 6.63   | 9            | 0.00    | 4.69   | 16                | 1.50    | 8.94   | 0.312               | 0.327                        | 0.718          | 0.436                   | 0.888                   | 0.449                   |
|                        | Morphology Normal (%)              | 30           | 14.00   | 10.16  | 25                | 5.00    | 10.54  | 19           | 5.00    | 4.66   | 18                | 6.00    | 5.41   | <0.001              | 0.001                        | 0.753          | <0.001                  | 0.980                   | 0.001                   |
|                        | Morphology Head Defects (%)        | 30           | 69.50   | 12.27  | 25                | 83.00   | 13.77  | 19           | 82.00   | 9.70   | 18                | 79.50   | 11.89  | <0.001              | 0.001                        | 0.258          | <0.001                  | 0.475                   | 0.023                   |
|                        | Morphology Mid-Piece Defects (%)   | 30           | 49.00   | 16.42  | 25                | 6.00    | 13.99  | 19           | 13.00   | 7.83   | 18                | 12.00   | 7.71   | <0.001              | <0.001                       | 0.443          | <0.001                  | 0.720                   | <0.001                  |
|                        | Morphology Tail Defects (%)        | 30           | 16.50   | 13.63  | 25                | 45.00   | 21.68  | 19           | 48.00   | 15.54  | 18                | 40.50   | 18.27  | <0.001              | <0.001                       | 0.845          | <0.001                  | 0.971                   | <0.001                  |
|                        | Spermatogenesis Cells (Mio/mL)     | 28           | 0.15    | 2.87   | 22                | 0.70    | 1.11   | 16           | 1.55    | 1.95   | 16                | 0.89    | 5.17   | 0.265               | 0.732                        | 0.491          | 0.001                   | 0.095                   | 0.61                    |
|                        | Fructose (pg/mL)                   | 5            | 15.10   | 5.56   | 24                | 16.35   | 10.42  | 19           | 15.20   | 8.55   | 22                | 17.30   | 8.60   | 0.594               | 0.489                        | 0.592          | 0.945                   | 0.495                   | 0.425                   |
|                        | alpha-Glucosidase (pg/mL)          | 4            | 15.90   | 17.08  | 24                | 13.40   | 10.00  | 19           | 19.80   | 10.00  | 21                | 15.40   | 10.01  | 0.776               | 0.557                        | 0.320          | 0.725                   | 0.531                   | 0.136                   |
| Elastase (pg/mL)       | 4                                  | 11.00        | 46.99   | 24     | 20.00             | 382.71  | 19     | 79.00        | 111.38  | 21     | 96.00             | 159.86  | 0.547  | 0.456               | 0.893                        | 0.116          | 0.088                   | 0.72                    |                         |
| Zinc (pg/mL)           | 4                                  | 4.00         | 2.10    | 24     | 4.30              | 2.99    | 19     | 6.10         | 3.02    | 18     | 4.55              | 3.84    | 0.776  | 1.000               | 0.499                        | 0.505          | 0.939                   | 0.475                   |                         |
| IL-8 (pg/mL)           | 29                                 | 1835.00      | 2477.03 | 25     | 1888.00           | 3631.81 | 19     | 3249.00      | 2275.83 | 21     | 6079.00           | 7299.31 | 0.869  | 1.000               | 0.196                        | 0.005          | 0.065                   | 0.325                   |                         |
| Testosterone (pg/mL)   | 0                                  | N/A          | N/A     | 25     | 458.00            | 288.11  | 0      | N/A          | N/A     | 24     | 315.00            | 140.03  | N/A    | N/A                 | N/A                          | N/A            | 0.910                   | N/A                     |                         |
| Estradiol (pg/mL)      | 30                                 | 34.50        | 11.61   | 22     | 36.50             | 10.97   | 18     | 42.00        | 5.71    | 23     | 35.00             | 11.51   | 0.753  | 0.165               | 0.017                        | 0.054          | 0.440                   | 0.105                   |                         |
| CRP (pg/mL)            | 0                                  | N/A          | N/A     | 24     | 0.00              | 7.73    | 0      | N/A          | N/A     | 24     | 0.90              | 6.49    | N/A    | N/A                 | N/A                          | N/A            | 0.004                   | N/A                     |                         |
| PSA (pg/mL)            | 0                                  | N/A          | N/A     | 24     | 0.57              | 0.31    | 0      | N/A          | N/A     | 23     | 0.79              | 1.26    | N/A    | N/A                 | N/A                          | N/A            | 0.132                   | N/A                     |                         |
| Uro-flow               | Maximum Flowthrough (mL/sec)       | 0            | N/A     | N/A    | 24                | 18.60   | 7.67   | 0            | N/A     | N/A    | 20                | 14.75   | 7.61   | N/A                 | N/A                          | N/A            | N/A                     | 0.258                   | N/A                     |
|                        | Total Volume (mL)                  | 0            | N/A     | N/A    | 24                | 340.00  | 189.28 | 0            | N/A     | N/A    | 20                | 290.50  | 125.43 | N/A                 | N/A                          | N/A            | N/A                     | 1.000                   | N/A                     |
| Questionnaires         | CPSI Pain                          | 25           | 0.00    | 2.00   | 23                | 12.00   | 4.37   | 0            | N/A     | N/A    | 24                | 13.50   | 2.93   | <0.001              | <0.001                       | N/A            | N/A                     | 0.104                   | <0.001                  |
|                        | CPSI Urinary                       | 25           | 1.00    | 1.45   | 23                | 4.00    | 2.64   | 0            | N/A     | N/A    | 24                | 5.00    | 2.51   | <0.001              | <0.001                       | N/A            | N/A                     | 0.198                   | <0.001                  |
|                        | CPSI Quality of Life               | 25           | 0.00    | 1.48   | 23                | 8.00    | 2.95   | 0            | N/A     | N/A    | 24                | 10.00   | 1.79   | <0.001              | <0.001                       | N/A            | N/A                     | 0.113                   | <0.001                  |
|                        | CPSI Total                         | 25           | 1.00    | 3.69   | 23                | 24.00   | 8.41   | 0            | N/A     | N/A    | 24                | 28.00   | 4.78   | <0.001              | <0.001                       | N/A            | N/A                     | 0.115                   | <0.001                  |
|                        | IPSS                               | 19           | 2.00    | 2.24   | 23                | 11.00   | 6.34   | 0            | N/A     | N/A    | 24                | 15.00   | 6.09   | <0.001              | <0.001                       | N/A            | N/A                     | 0.916                   | <0.001                  |
|                        | HADS Anxiety                       | 7            | 5.00    | 2.45   | 13                | 7.00    | 3.75   | 0            | N/A     | N/A    | 11                | 7.00    | 6.23   | 0.056               | 0.077                        | N/A            | N/A                     | 0.910                   | N/A                     |
|                        | HADS Depression                    | 9            | 2.00    | 4.47   | 13                | 8.00    | 3.78   | 7            | 7.00    | 3.78   | 11                | 5.00    | 4.99   | 0.001               | 0.049                        | 1.000          | N/A                     | 1.000                   | 0.095                   |
| HADS Total             | 7                                  | 7.00         | 3.44    | 13     | 16.00             | 7.09    | 0      | N/A          | N/A     | 11     | 12.00             | 10.89   | 0.003  | 0.028               | N/A                          | N/A            | 0.733                   | N/A                     |                         |

**Supplementary Figure 1: The summary of clinical data obtained from CP/CPPS patients and healthy donors.** The raw data comprise semen parameters (available for all probands), biochemical parameters of ejaculates (available for all probands), biochemical parameters of blood (available for CP/CPPS patients only), uroflow parameters (available for CP/CPPS patients only), data collected in the frame of CP/CPPS relevant questionnaires (available for all CP/CPPS patients and for young healthy donors). Statistical comparison for each of the available parameters was done with regard to the age of the probands in order to distinguish between age-effects and disease (CP/CPPS)-effects (highly significant differences,  $p \leq 0.01$ , are shown in dark red, and not significant differences are shown in steps from light red to green). Abbreviations: HV: healthy volunteers; CP/CPPS: chronic prostatitis chronic pelvic pain syndrome; n: number of analyzed probands; STD: standard deviation; N/A: not applicable; IL-8: interleukin 8; CRP: C-reactive protein; PSA: prostate specific antigen; CPSI: chronic prostatitis symptom index; IPSS: international prostate symptom score; HADS: hospital anxiety and depression score.

|                          | Gene Symbol | Full Gene Name                              | Fold Regulation<br>(HMC-1) | Fold Regulation<br>(LAD2) |
|--------------------------|-------------|---------------------------------------------|----------------------------|---------------------------|
| Interleukin Family Genes | IL1B        | interleukin 1 beta                          | -2.8                       | 1.3                       |
|                          | IL6         | interleukin 6                               | -2.2                       | 1.7                       |
|                          | IL7         | interleukin 7                               | -1.1                       | -2.8                      |
|                          | IL8         | interleukin 8                               | -2.4                       | 30.6                      |
|                          | IL9         | interleukin 9                               | -2.1                       | -1.1                      |
|                          | IL12B       | interleukin 12B                             | -2.2                       | 2.3                       |
|                          | IL16        | interleukin 16                              | 1.3                        | -6.1                      |
|                          | IL17F       | interleukin 17F                             | -2.9                       | 3.7                       |
|                          | IL21        | interleukin 21                              | -1.4                       | 4.9                       |
|                          | IL22        | interleukin 22                              | -1.8                       | 5.4                       |
|                          | IL27        | interleukin 27                              | -2.1                       | 2.3                       |
| C-Chemokine Family Genes | CCL5        | C-C motif chemokine ligand 5                | -2.9                       | 1.5                       |
|                          | CCL7        | C-C motif chemokine ligand 7                | -1.7                       | 3.5                       |
|                          | CCL8        | C-C motif chemokine ligand 8                | -1.0                       | 2.3                       |
|                          | CCL13       | C-C motif chemokine ligand 13               | -1.9                       | 2.1                       |
|                          | CCL18       | C-C motif chemokine ligand 18               | -7.3                       | 1.5                       |
|                          | CCL20       | C-C motif chemokine ligand 20               | -2.1                       | 1.2                       |
|                          | CX3CL1      | C-X3-C motif chemokine ligand 1             | -1.1                       | 2.8                       |
|                          | CXCL2       | C-X-C motif chemokine ligand 2              | -9.5                       | 6.5                       |
|                          | CXCL11      | C-X-C motif chemokine ligand 11             | -2.1                       | -1.1                      |
|                          | CXCL16      | C-X-C motif chemokine ligand 16             | -2.5                       | 1.1                       |
|                          | XCL1        | X-C motif chemokine ligand 1                | -9.4                       | -1.1                      |
| Other Genes              | BMP2        | bone morphogenetic protein 2                | -3.1                       | 1.0                       |
|                          | BMP7        | bone morphogenetic protein 7                | -6.6                       | -2.4                      |
|                          | CSF3        | colony stimulating factor 3                 | -3.6                       | 4.3                       |
|                          | IFNA2       | interferon alpha 2                          | 3.7                        | 2.3                       |
|                          | IFNG        | interferon gamma                            | 3.8                        | 4.4                       |
|                          | MSTN        | myostatin                                   | -1.3                       | 4.9                       |
|                          | SPP1        | secreted phosphoprotein 1                   | -2.3                       | -1.1                      |
|                          | TNFRSF11B   | TNF receptor superfamily member 11b         | -2.6                       | -1.1                      |
|                          | TNFSF11     | tumor necrosis factor superfamily member 11 | -2.5                       | -1.8                      |
|                          | VEGFA       | vascular endothelial growth factor A        | -2.0                       | 1.3                       |

**Supplementary Figure 2: Summary of transcriptional analyses of inflammatory factors in mast cell lines before and after estradiol treatment.** Human mast cell lines HMC-1 and LAD2 were treated with 100 nM estradiol ( $E_2$ ) for 24 hours. RNA samples from control (untreated) and  $E_2$ -treated cells were reverse transcribed and analyzed using RT2 Profiler PCR array “Human cytokines and chemokines” (Qiagen, covers 84 inflammatory genes). Expression data of detectable genes are presented as a fold regulation in comparison to controls. Upregulation and downregulation (“-”) values more than 2-fold are highlighted in red and blue, respectively. HMC-1 cells, which possess through CpG-promoter methylation inactivated estrogen receptors, *ESR1* and *ESR2*, responded to  $E_2$ -excess with more than 2-fold downregulation of 21 out of 32 detectable inflammatory factors (7 genes exhibited unchanged transcription levels and 2 genes were upregulated). In contrast, LAD2 cells possessing unmethylated and active *ESR1* and *ESR2*, responded to  $E_2$  with upregulation of 15 out of 32 detectable inflammatory factors (14 genes exhibited unchanged transcription levels and 3 genes were downregulated). Abbreviations: ILs: interleukins; CCLs: C-C motif chemokines; CXCLs: C-X-C motif chemokines; BMPs: bone morphogenetic proteins; CSF3: colony stimulating factor 3; IFNs: interferons; MSTN: myostatin; SPP1: secreted phosphoprotein 1; TNFRSF11B: tumor necrosis factor receptor superfamily member 11b; TNFSF11: tumor necrosis factor superfamily member 11; VEGFA: vascular endothelial growth factor alpha.

|                 |           | LAD2 [%] |          | HMC-1 [%] |          | Methylation Change [%] |       |
|-----------------|-----------|----------|----------|-----------|----------|------------------------|-------|
| Method          | Gene      | Control  | 100nM E2 | Control   | 100nM E2 | LAD2                   | HMC-1 |
| Methyl II Array | BCL10     | 0        | 0        | 3         | 1        | 0                      | -2    |
|                 | BCL3      | 0        | 0        | 0         | 61       | 0                      | 61    |
|                 | ELANE     | 100      | 100      | 99        | 99       | 0                      | 0     |
|                 | FOXP3     | 99       | 99       | 99        | 98       | 0                      | -1    |
|                 | GATA3     | 51       | 1        | 0         | 0        | -50                    | 0     |
|                 | HMOX1     | 1        | 1        | 0         | 0        | 0                      | 0     |
|                 | IGF2BP2   | 0        | 0        | 93        | 85       | 0                      | -8    |
|                 | IL12A     | 1        | 1        | 0         | 1        | 0                      | 1     |
|                 | INHA      | 66       | 28       | 72        | 70       | -37                    | -2    |
|                 | INHBA     | 100      | 100      | 100       | 100      | 0                      | 0     |
|                 | IRF1      | 0        | 0        | 0         | 0        | 0                      | 0     |
|                 | LTB       | 86       | 85       | N/A       | N/A      | -2                     | N/A   |
|                 | MALT1     | N/A      | 0        | 1         | N/A      | N/A                    | N/A   |
|                 | MAP3K7    | 0        | 0        | 1         | 6        | 0                      | 5     |
|                 | MYD88     | 0        | 0        | 0         | 0        | 0                      | 0     |
|                 | NOD1      | 0        | 0        | N/A       | 0        | 0                      | N/A   |
|                 | SMAD3     | 100      | 100      | 100       | 99       | 0                      | -1    |
|                 | SOD1      | 0        | 0        | 1         | 0        | 0                      | -1    |
|                 | STAT5A    | 82       | 81       | 2         | 2        | -1                     | 0     |
|                 | TLR2      | 0        | 0        | 0         | 56       | 0                      | 56    |
| TRAF2           | 0         | 0        | 0        | 0         | 0        | 0                      |       |
| TRAF6           | 0         | 0        | 0        | 0         | 0        | 0                      |       |
| Pyrosequencing  | CXCL12    | 74       | 74       | 75        | 77       | 0                      | 2     |
|                 | ER1       | 2        | 2        | 68        | 67       | 0                      | -1    |
|                 | ER2       | 3        | 2        | 94        | 93       | -1                     | -2    |
|                 | AR(01)    | 2        | 2        | 44        | 43       | 0                      | 0     |
|                 | AR(04)    | 4        | 3        | 42        | 41       | -1                     | 0     |
|                 | IL-13     | 39       | 38       | 20        | 17       | -1                     | -4    |
|                 | CXCR4(01) | 1        | 1        | 1         | 1        | 0                      | 0     |
|                 | CXCR4(05) | 2        | 2        | 2         | 1        | 0                      | -1    |

**Supplementary Figure 3: Summary of CpG-promoter methylation analyses of inflammatory factors in mast cell lines before and after estradiol treatment.** DNA from untreated (control) and estradiol treated (100 nM, 24 hours) mast cell lines HMC-1 and LAD2 was bisulfite-converted and analyzed using EpiTect Methyl II Signature PCR array “Human cytokine production” (Qiagen, covers 22 inflammatory genes) and by pyrosequencing (6 genes) with ready-to-use primer sets (Qiagen) for indicated genes (note: *AR* and *CXCR4* were analyzed in two different promoter regions). High levels of promoter methylation were found in control LAD2 cells in 10 genes and in control HMC-1 cells in 11 (indicated in green). For most inflammatory genes, E<sub>2</sub> treatment did not have an effect on DNA methylation. However, four out of 28 analyzed genes showed significant changes (50% and 37% decrease of methylation in LAD2 cells in *GATA3* and *INHA*, respectively; 61% and 56% increase of methylation in HMC cells in *BCL3* and *TLR2*, respectively). Abbreviations (gene with noticeable methylation and methylation changes are listed): BCL3: B-cell CLL/Lymphoma 3; ELANE: elastase, neutrophil expressed; FOXP3: forkhead box P3; GATA3: GATA binding protein 3; IGF2BP2: Insulin-like growth factor 2 mRNA-binding protein 2; INHA: inhibin A; INHBA: inhibin beta A subunit; LTB: lymphotoxin beta; SMAD3: SMAD family member 3; STAT5A: Signal transducer and activator of transcription 5A; TLR2: toll-like receptor 2; CXCL12: C-X-C motif chemokine 12; ER1: estrogen receptor alpha; ER2: estrogen receptor beta; AR: androgen receptor; IL13: interleukin 13; N/A: not applicable as did not pass the quality control.
